# Supplementary material for: Prevalence of Chlamydial Infections in Fattening Pigs and Their Influencing Factors
Source: PLoS One. 2015 Nov 30;10(11):e0143576. doi: 10.1371/journal.pone.0143576 (PMC4664257; doi:10.1371/journal.pone.0143576)
Supplement: S1 Dataset — (XLSX) [file pone.0143576.s004.xlsx]

## Sheet: Blatt1
Pig Nr.	farm nos.	1st sampling date	2nd sampling date	F = fattening farm, FF=farrow-to-finish-farm	total no. of fattening pigs on farm	score recruitment of pigs, expl. in main text	all-in/all-out production	outdoor access	bedding material	cattle on same farm existent	distance (m) of cattle on same farm	direct contact to cattle on same farm	sheep on same farm existent	distance (m) to sheep on same farm	direct contact to sheep on same farm	goats on same farm existent	distance (m) to goats on same farm	indirect contact to own ruminants	distance (m) to foreign cattle	foreign sheep up to 1000 m distance existent	distance (m) to foreign sheep	foreign goats up to 1000 m distance existent	distance (m) to foreign sheep	poultry on same farm	poultry on foreign farm up to 1000 m distance	possible contact to wild boars	possible contact to wild birds	hygiene score, expl. in main text, *	infestation with flies score*	infestation with rodents score*	cleanliness of animal surface 1st sampling*	cleanliness of animal surface 2nd sampling*	cleanliness of housing in general 1st sampling*	cleanliness of pig pens 1st sampling*	cleanliness of outdoor run at first sampling*	average score cleanliness housing,pen,outdoor 1st sampling*	cleanliness of housing in general 2nd sampling*	cleanliness of pig pens 2nd sampling*	cleanliness of outdoor run at 2nd sampling*	average score cleanliness housing,pen,outdoor 2nd sampling*	group diarrhea problems assessed by farmer	group lameness problems assessed by farmer	group eye problems assessed by farmer	group respiratory problems assessed by farmer	antibiotic group treatment beginning of fattening period	tetracycline group treatment	macrolid group treatment	sulfadimidine group treatment	amoxicillin group treatment
1	1	25.09.2013	17.12.2013	F	70	1	yes	no	no	yes	5	no	no		no	no		yes	500	no		no		yes	no	no	yes	2	2	1	1	2	1	1		1	3	2		3	no	yes	no	no	no	no	no	no	no
2	1	25.09.2013	17.12.2013	F	70	1	yes	no	no	yes	5	no	no		no	no		yes	500	no		no		yes	no	no	yes	2	2	1	1	2	1	1		1	3	2		3	no	yes	no	no	no	no	no	no	no
3	1	25.09.2013	17.12.2013	F	70	1	yes	no	no	yes	5	no	no		no	no		yes	500	no		no		yes	no	no	yes	2	2	1	1	2	1	1		1	3	2		3	no	yes	no	no	no	no	no	no	no
4	1	25.09.2013	17.12.2013	F	70	1	yes	no	no	yes	5	no	no		no	no		yes	500	no		no		yes	no	no	yes	2	2	1	1	2	1	1		1	3	2		3	no	yes	no	no	no	no	no	no	no
5	1	25.09.2013	17.12.2013	F	70	1	yes	no	no	yes	5	no	no		no	no		yes	500	no		no		yes	no	no	yes	2	2	1	1	2	1	1		1	3	2		3	no	yes	no	no	no	no	no	no	no
6	1	25.09.2013	17.12.2013	F	70	1	yes	no	no	yes	5	no	no		no	no		yes	500	no		no		yes	no	no	yes	2	2	1	1	2	1	1		1	3	2		3	no	yes	no	no	no	no	no	no	no
7	1	25.09.2013	17.12.2013	F	70	1	yes	no	no	yes	5	no	no		no	no		yes	500	no		no		yes	no	no	yes	2	2	1	1	2	1	1		1	3	2		3	no	yes	no	no	no	no	no	no	no
8	1	25.09.2013	17.12.2013	F	70	1	yes	no	no	yes	5	no	no		no	no		yes	500	no		no		yes	no	no	yes	2	2	1	1	2	1	1		1	3	2		3	no	yes	no	no	no	no	no	no	no
9	1	25.09.2013	17.12.2013	F	70	1	yes	no	no	yes	5	no	no		no	no		yes	500	no		no		yes	no	no	yes	2	2	1	1	2	1	1		1	3	2		3	no	yes	no	no	no	no	no	no	no
10	1	25.09.2013	17.12.2013	F	70	1	yes	no	no	yes	5	no	no		no	no		yes	500	no		no		yes	no	no	yes	2	2	1	1	2	1	1		1	3	2		3	no	yes	no	no	no	no	no	no	no
11	1	25.09.2013	17.12.2013	F	70	1	yes	no	no	yes	5	no	no		no	no		yes	500	no		no		yes	no	no	yes	2	2	1	1	2	1	1		1	3	2		3	no	yes	no	no	no	no	no	no	no
12	1	25.09.2013	17.12.2013	F	70	1	yes	no	no	yes	5	no	no		no	no		yes	500	no		no		yes	no	no	yes	2	2	1	1	2	1	1		1	3	2		3	no	yes	no	no	no	no	no	no	no
13	1	25.09.2013	17.12.2013	F	70	1	yes	no	no	yes	5	no	no		no	no		yes	500	no		no		yes	no	no	yes	2	2	1	1	2	1	1		1	3	2		3	no	yes	no	no	no	no	no	no	no
14	1	25.09.2013	17.12.2013	F	70	1	yes	no	no	yes	5	no	no		no	no		yes	500	no		no		yes	no	no	yes	2	2	1	1	2	1	1		1	3	2		3	no	yes	no	no	no	no	no	no	no
15	1	25.09.2013	17.12.2013	F	70	1	yes	no	no	yes	5	no	no		no	no		yes	500	no		no		yes	no	no	yes	2	2	1	1	2	1	1		1	3	2		3	no	yes	no	no	no	no	no	no	no
16	1	25.09.2013	17.12.2013	F	70	1	yes	no	no	yes	5	no	no		no	no		yes	500	no		no		yes	no	no	yes	2	2	1	1	2	1	1		1	3	2		3	no	yes	no	no	no	no	no	no	no
17	1	25.09.2013	17.12.2013	F	70	1	yes	no	no	yes	5	no	no		no	no		yes	500	no		no		yes	no	no	yes	2	2	1	1	2	1	1		1	3	2		3	no	yes	no	no	no	no	no	no	no
18	1	25.09.2013	17.12.2013	F	70	1	yes	no	no	yes	5	no	no		no	no		yes	500	no		no		yes	no	no	yes	2	2	1	1	2	1	1		1	3	2		3	no	yes	no	no	no	no	no	no	no
19	1	25.09.2013	17.12.2013	F	70	1	yes	no	no	yes	5	no	no		no	no		yes	500	no		no		yes	no	no	yes	2	2	1	1	2	1	1		1	3	2		3	no	yes	no	no	no	no	no	no	no
20	1	25.09.2013	17.12.2013	F	70	1	yes	no	no	yes	5	no	no		no	no		yes	500	no		no		yes	no	no	yes	2	2	1	1	2	1	1		1	3	2		3	no	yes	no	no	no	no	no	no	no
21	1	25.09.2013	17.12.2013	F	70	1	yes	no	no	yes	5	no	no		no	no		yes	500	no		no		yes	no	no	yes	2	2	1	1	2	1	1		1	3	2		3	no	yes	no	no	no	no	no	no	no
22	1	25.09.2013	17.12.2013	F	70	1	yes	no	no	yes	5	no	no		no	no		yes	500	no		no		yes	no	no	yes	2	2	1	1	2	1	1		1	3	2		3	no	yes	no	no	no	no	no	no	no
23	1	25.09.2013	17.12.2013	F	70	1	yes	no	no	yes	5	no	no		no	no		yes	500	no		no		yes	no	no	yes	2	2	1	1	2	1	1		1	3	2		3	no	yes	no	no	no	no	no	no	no
24	1	25.09.2013	17.12.2013	F	70	1	yes	no	no	yes	5	no	no		no	no		yes	500	no		no		yes	no	no	yes	2	2	1	1	2	1	1		1	3	2		3	no	yes	no	no	no	no	no	no	no
25	1	25.09.2013	17.12.2013	F	70	1	yes	no	no	yes	5	no	no		no	no		yes	500	no		no		yes	no	no	yes	2	2	1	1	2	1	1		1	3	2		3	no	yes	no	no	no	no	no	no	no
26	1	25.09.2013	17.12.2013	F	70	1	yes	no	no	yes	5	no	no		no	no		yes	500	no		no		yes	no	no	yes	2	2	1	1	2	1	1		1	3	2		3	no	yes	no	no	no	no	no	no	no
27	1	25.09.2013	17.12.2013	F	70	1	yes	no	no	yes	5	no	no		no	no		yes	500	no		no		yes	no	no	yes	2	2	1	1	2	1	1		1	3	2		3	no	yes	no	no	no	no	no	no	no
28	1	25.09.2013	17.12.2013	F	70	1	yes	no	no	yes	5	no	no		no	no		yes	500	no		no		yes	no	no	yes	2	2	1	1	2	1	1		1	3	2		3	no	yes	no	no	no	no	no	no	no
29	1	25.09.2013	17.12.2013	F	70	1	yes	no	no	yes	5	no	no		no	no		yes	500	no		no		yes	no	no	yes	2	2	1	1	2	1	1		1	3	2		3	no	yes	no	no	no	no	no	no	no
30	1	25.09.2013	17.12.2013	F	70	1	yes	no	no	yes	5	no	no		no	no		yes	500	no		no		yes	no	no	yes	2	2	1	1	2	1	1		1	3	2		3	no	yes	no	no	no	no	no	no	no
31	1	25.09.2013	17.12.2013	F	70	1	yes	no	no	yes	5	no	no		no	no		yes	500	no		no		yes	no	no	yes	2	2	1	1	2	1	1		1	3	2		3	no	yes	no	no	no	no	no	no	no
32	1	25.09.2013	17.12.2013	F	70	1	yes	no	no	yes	5	no	no		no	no		yes	500	no		no		yes	no	no	yes	2	2	1	1	2	1	1		1	3	2		3	no	yes	no	no	no	no	no	no	no
33	1	25.09.2013	17.12.2013	F	70	1	yes	no	no	yes	5	no	no		no	no		yes	500	no		no		yes	no	no	yes	2	2	1	1	2	1	1		1	3	2		3	no	yes	no	no	no	no	no	no	no
34	1	25.09.2013	17.12.2013	F	70	1	yes	no	no	yes	5	no	no		no	no		yes	500	no		no		yes	no	no	yes	2	2	1	1	2	1	1		1	3	2		3	no	yes	no	no	no	no	no	no	no
35	1	25.09.2013	17.12.2013	F	70	1	yes	no	no	yes	5	no	no		no	no		yes	500	no		no		yes	no	no	yes	2	2	1	1	2	1	1		1	3	2		3	no	yes	no	no	no	no	no	no	no
36	1	25.09.2013	17.12.2013	F	70	1	yes	no	no	yes	5	no	no		no	no		yes	500	no		no		yes	no	no	yes	2	2	1	1	2	1	1		1	3	2		3	no	yes	no	no	no	no	no	no	no
37	1	25.09.2013	17.12.2013	F	70	1	yes	no	no	yes	5	no	no		no	no		yes	500	no		no		yes	no	no	yes	2	2	1	1	2	1	1		1	3	2		3	no	yes	no	no	no	no	no	no	no
38	1	25.09.2013	17.12.2013	F	70	1	yes	no	no	yes	5	no	no		no	no		yes	500	no		no		yes	no	no	yes	2	2	1	1	2	1	1		1	3	2		3	no	yes	no	no	no	no	no	no	no
39	1	25.09.2013	17.12.2013	F	70	1	yes	no	no	yes	5	no	no		no	no		yes	500	no		no		yes	no	no	yes	2	2	1	1	2	1	1		1	3	2		3	no	yes	no	no	no	no	no	no	no
40	1	25.09.2013	17.12.2013	F	70	1	yes	no	no	yes	5	no	no		no	no		yes	500	no		no		yes	no	no	yes	2	2	1	1	2	1	1		1	3	2		3	no	yes	no	no	no	no	no	no	no
41	1	25.09.2013	17.12.2013	F	70	1	yes	no	no	yes	5	no	no		no	no		yes	500	no		no		yes	no	no	yes	2	2	1	1	2	1	1		1	3	2		3	no	yes	no	no	no	no	no	no	no
42	1	25.09.2013	17.12.2013	F	70	1	yes	no	no	yes	5	no	no		no	no		yes	500	no		no		yes	no	no	yes	2	2	1	1	2	1	1		1	3	2		3	no	yes	no	no	no	no	no	no	no
43	1	25.09.2013	17.12.2013	F	70	1	yes	no	no	yes	5	no	no		no	no		yes	500	no		no		yes	no	no	yes	2	2	1	1	2	1	1		1	3	2		3	no	yes	no	no	no	no	no	no	no
44	1	25.09.2013	17.12.2013	F	70	1	yes	no	no	yes	5	no	no		no	no		yes	500	no		no		yes	no	no	yes	2	2	1	1	2	1	1		1	3	2		3	no	yes	no	no	no	no	no	no	no
45	1	25.09.2013	17.12.2013	F	70	1	yes	no	no	yes	5	no	no		no	no		yes	500	no		no		yes	no	no	yes	2	2	1	1	2	1	1		1	3	2		3	no	yes	no	no	no	no	no	no	no
46	1	25.09.2013	17.12.2013	F	70	1	yes	no	no	yes	5	no	no		no	no		yes	500	no		no		yes	no	no	yes	2	2	1	1	2	1	1		1	3	2		3	no	yes	no	no	no	no	no	no	no
47	1	25.09.2013	17.12.2013	F	70	1	yes	no	no	yes	5	no	no		no	no		yes	500	no		no		yes	no	no	yes	2	2	1	1	2	1	1		1	3	2		3	no	yes	no	no	no	no	no	no	no
48	1	25.09.2013	17.12.2013	F	70	1	yes	no	no	yes	5	no	no		no	no		yes	500	no		no		yes	no	no	yes	2	2	1	1	2	1	1		1	3	2		3	no	yes	no	no	no	no	no	no	no
49	1	25.09.2013	17.12.2013	F	70	1	yes	no	no	yes	5	no	no		no	no		yes	500	no		no		yes	no	no	yes	2	2	1	1	2	1	1		1	3	2		3	no	yes	no	no	no	no	no	no	no
50	1	25.09.2013	17.12.2013	F	70	1	yes	no	no	yes	5	no	no		no	no		yes	500	no		no		yes	no	no	yes	2	2	1	1	2	1	1		1	3	2		3	no	yes	no	no	no	no	no	no	no
51	1	25.09.2013	17.12.2013	F	70	1	yes	no	no	yes	5	no	no		no	no		yes	500	no		no		yes	no	no	yes	2	2	1	1	2	1	1		1	3	2		3	no	yes	no	no	no	no	no	no	no
52	1	25.09.2013	17.12.2013	F	70	1	yes	no	no	yes	5	no	no		no	no		yes	500	no		no		yes	no	no	yes	2	2	1	1	2	1	1		1	3	2		3	no	yes	no	no	no	no	no	no	no
53	1	25.09.2013	17.12.2013	F	70	1	yes	no	no	yes	5	no	no		no	no		yes	500	no		no		yes	no	no	yes	2	2	1	1	2	1	1		1	3	2		3	no	yes	no	no	no	no	no	no	no
54	1	25.09.2013	17.12.2013	F	70	1	yes	no	no	yes	5	no	no		no	no		yes	500	no		no		yes	no	no	yes	2	2	1	1	2	1	1		1	3	2		3	no	yes	no	no	no	no	no	no	no
55	1	25.09.2013	17.12.2013	F	70	1	yes	no	no	yes	5	no	no		no	no		yes	500	no		no		yes	no	no	yes	2	2	1	1	2	1	1		1	3	2		3	no	yes	no	no	no	no	no	no	no
56	1	25.09.2013	17.12.2013	F	70	1	yes	no	no	yes	5	no	no		no	no		yes	500	no		no		yes	no	no	yes	2	2	1	1	2	1	1		1	3	2		3	no	yes	no	no	no	no	no	no	no
57	1	25.09.2013	17.12.2013	F	70	1	yes	no	no	yes	5	no	no		no	no		yes	500	no		no		yes	no	no	yes	2	2	1	1	2	1	1		1	3	2		3	no	yes	no	no	no	no	no	no	no
58	1	25.09.2013	17.12.2013	F	70	1	yes	no	no	yes	5	no	no		no	no		yes	500	no		no		yes	no	no	yes	2	2	1	1	2	1	1		1	3	2		3	no	yes	no	no	no	no	no	no	no
59	1	25.09.2013	17.12.2013	F	70	1	yes	no	no	yes	5	no	no		no	no		yes	500	no		no		yes	no	no	yes	2	2	1	1	2	1	1		1	3	2		3	no	yes	no	no	no	no	no	no	no
60	1	25.09.2013	17.12.2013	F	70	1	yes	no	no	yes	5	no	no		no	no		yes	500	no		no		yes	no	no	yes	2	2	1	1	2	1	1		1	3	2		3	no	yes	no	no	no	no	no	no	no
61	1	25.09.2013	17.12.2013	F	70	1	yes	no	no	yes	5	no	no		no	no		yes	500	no		no		yes	no	no	yes	2	2	1	1	2	1	1		1	3	2		3	no	yes	no	no	no	no	no	no	no
62	1	25.09.2013	17.12.2013	F	70	1	yes	no	no	yes	5	no	no		no	no		yes	500	no		no		yes	no	no	yes	2	2	1	1	2	1	1		1	3	2		3	no	yes	no	no	no	no	no	no	no
63	1	25.09.2013	17.12.2013	F	70	1	yes	no	no	yes	5	no	no		no	no		yes	500	no		no		yes	no	no	yes	2	2	1	1	2	1	1		1	3	2		3	no	yes	no	no	no	no	no	no	no
64	1	25.09.2013	17.12.2013	F	70	1	yes	no	no	yes	5	no	no		no	no		yes	500	no		no		yes	no	no	yes	2	2	1	1	2	1	1		1	3	2		3	no	yes	no	no	no	no	no	no	no
65	1	25.09.2013	17.12.2013	F	70	1	yes	no	no	yes	5	no	no		no	no		yes	500	no		no		yes	no	no	yes	2	2	1	1	2	1	1		1	3	2		3	no	yes	no	no	no	no	no	no	no
66	1	25.09.2013	17.12.2013	F	70	1	yes	no	no	yes	5	no	no		no	no		yes	500	no		no		yes	no	no	yes	2	2	1	1	2	1	1		1	3	2		3	no	yes	no	no	no	no	no	no	no
67	1	25.09.2013	17.12.2013	F	70	1	yes	no	no	yes	5	no	no		no	no		yes	500	no		no		yes	no	no	yes	2	2	1	1	2	1	1		1	3	2		3	no	yes	no	no	no	no	no	no	no
68	1	25.09.2013	17.12.2013	F	70	1	yes	no	no	yes	5	no	no		no	no		yes	500	no		no		yes	no	no	yes	2	2	1	1	2	1	1		1	3	2		3	no	yes	no	no	no	no	no	no	no
69	1	25.09.2013	17.12.2013	F	70	1	yes	no	no	yes	5	no	no		no	no		yes	500	no		no		yes	no	no	yes	2	2	1	1	2	1	1		1	3	2		3	no	yes	no	no	no	no	no	no	no
70	1	25.09.2013	17.12.2013	F	70	1	yes	no	no	yes	5	no	no		no	no		yes	500	no		no		yes	no	no	yes	2	2	1	1	2	1	1		1	3	2		3	no	yes	no	no	no	no	no	no	no
71	2	10.10.2013	30.12.2013	F	50	1	yes	no	yes	yes	5	no	no		no	no		yes	100	yes	200	no		no	yes	no	yes	3	3	1	1	1	2	2		2	2	1		2	no	no	no	no	no	no	no	no	no
72	2	10.10.2013	30.12.2013	F	50	1	yes	no	yes	yes	5	no	no		no	no		yes	100	yes	200	no		no	yes	no	yes	3	3	1	1	1	2	2		2	2	1		2	no	no	no	no	no	no	no	no	no
73	2	10.10.2013	30.12.2013	F	50	1	yes	no	yes	yes	5	no	no		no	no		yes	100	yes	200	no		no	yes	no	yes	3	3	1	1	1	2	2		2	2	1		2	no	no	no	no	no	no	no	no	no
74	2	10.10.2013	30.12.2013	F	50	1	yes	no	yes	yes	5	no	no		no	no		yes	100	yes	200	no		no	yes	no	yes	3	3	1	1	1	2	2		2	2	1		2	no	no	no	no	no	no	no	no	no
75	2	10.10.2013	30.12.2013	F	50	1	yes	no	yes	yes	5	no	no		no	no		yes	100	yes	200	no		no	yes	no	yes	3	3	1	1	1	2	2		2	2	1		2	no	no	no	no	no	no	no	no	no
76	2	10.10.2013	30.12.2013	F	50	1	yes	no	yes	yes	5	no	no		no	no		yes	100	yes	200	no		no	yes	no	yes	3	3	1	1	1	2	2		2	2	1		2	no	no	no	no	no	no	no	no	no
77	2	10.10.2013	30.12.2013	F	50	1	yes	no	yes	yes	5	no	no		no	no		yes	100	yes	200	no		no	yes	no	yes	3	3	1	1	1	2	2		2	2	1		2	no	no	no	no	no	no	no	no	no
78	2	10.10.2013	30.12.2013	F	50	1	yes	no	yes	yes	5	no	no		no	no		yes	100	yes	200	no		no	yes	no	yes	3	3	1	1	1	2	2		2	2	1		2	no	no	no	no	no	no	no	no	no
79	2	10.10.2013	30.12.2013	F	50	1	yes	no	yes	yes	5	no	no		no	no		yes	100	yes	200	no		no	yes	no	yes	3	3	1	1	1	2	2		2	2	1		2	no	no	no	no	no	no	no	no	no
80	2	10.10.2013	30.12.2013	F	50	1	yes	no	yes	yes	5	no	no		no	no		yes	100	yes	200	no		no	yes	no	yes	3	3	1	1	1	2	2		2	2	1		2	no	no	no	no	no	no	no	no	no
81	2	10.10.2013	30.12.2013	F	50	1	yes	no	yes	yes	5	no	no		no	no		yes	100	yes	200	no		no	yes	no	yes	3	3	1	1	1	2	2		2	2	1		2	no	no	no	no	no	no	no	no	no
82	2	10.10.2013	30.12.2013	F	50	1	yes	no	yes	yes	5	no	no		no	no		yes	100	yes	200	no		no	yes	no	yes	3	3	1	1	1	2	2		2	2	1		2	no	no	no	no	no	no	no	no	no
83	2	10.10.2013	30.12.2013	F	50	1	yes	no	yes	yes	5	no	no		no	no		yes	100	yes	200	no		no	yes	no	yes	3	3	1	1	1	2	2		2	2	1		2	no	no	no	no	no	no	no	no	no
84	2	10.10.2013	30.12.2013	F	50	1	yes	no	yes	yes	5	no	no		no	no		yes	100	yes	200	no		no	yes	no	yes	3	3	1	1	1	2	2		2	2	1		2	no	no	no	no	no	no	no	no	no
85	2	10.10.2013	30.12.2013	F	50	1	yes	no	yes	yes	5	no	no		no	no		yes	100	yes	200	no		no	yes	no	yes	3	3	1	1	1	2	2		2	2	1		2	no	no	no	no	no	no	no	no	no
86	2	10.10.2013	30.12.2013	F	50	1	yes	no	yes	yes	5	no	no		no	no		yes	100	yes	200	no		no	yes	no	yes	3	3	1	1	1	2	2		2	2	1		2	no	no	no	no	no	no	no	no	no
87	2	10.10.2013	30.12.2013	F	50	1	yes	no	yes	yes	5	no	no		no	no		yes	100	yes	200	no		no	yes	no	yes	3	3	1	1	1	2	2		2	2	1		2	no	no	no	no	no	no	no	no	no
88	2	10.10.2013	30.12.2013	F	50	1	yes	no	yes	yes	5	no	no		no	no		yes	100	yes	200	no		no	yes	no	yes	3	3	1	1	1	2	2		2	2	1		2	no	no	no	no	no	no	no	no	no
89	2	10.10.2013	30.12.2013	F	50	1	yes	no	yes	yes	5	no	no		no	no		yes	100	yes	200	no		no	yes	no	yes	3	3	1	1	1	2	2		2	2	1		2	no	no	no	no	no	no	no	no	no
90	2	10.10.2013	30.12.2013	F	50	1	yes	no	yes	yes	5	no	no		no	no		yes	100	yes	200	no		no	yes	no	yes	3	3	1	1	1	2	2		2	2	1		2	no	no	no	no	no	no	no	no	no
91	3	23.10.2013	05.01.2014	F	600	1	no	no	no	no		no	no		no	no			5	yes	500	yes	500	no	yes	no	no	2	1	2	1	1	3	1		2	3	3		3	no	yes	no	yes	no	no	no	no	no
92	3	23.10.2013	05.01.2014	F	600	1	no	no	no	no		no	no		no	no			5	yes	500	yes	500	no	yes	no	no	2	1	2	1	1	3	1		2	3	3		3	no	yes	no	yes	no	no	no	no	no
93	3	23.10.2013	05.01.2014	F	600	1	no	no	no	no		no	no		no	no			5	yes	500	yes	500	no	yes	no	no	2	1	2	1	1	3	1		2	3	3		3	no	yes	no	yes	no	no	no	no	no
94	3	23.10.2013	05.01.2014	F	600	1	no	no	no	no		no	no		no	no			5	yes	500	yes	500	no	yes	no	no	2	1	2	1	1	3	1		2	3	3		3	no	yes	no	yes	no	no	no	no	no
95	3	23.10.2013	05.01.2014	F	600	1	no	no	no	no		no	no		no	no			5	yes	500	yes	500	no	yes	no	no	2	1	2	1	1	3	1		2	3	3		3	no	yes	no	yes	no	no	no	no	no
96	3	23.10.2013	05.01.2014	F	600	1	no	no	no	no		no	no		no	no			5	yes	500	yes	500	no	yes	no	no	2	1	2	1	1	3	1		2	3	3		3	no	yes	no	yes	no	no	no	no	no
97	3	23.10.2013	05.01.2014	F	600	1	no	no	no	no		no	no		no	no			5	yes	500	yes	500	no	yes	no	no	2	1	2	1	1	3	1		2	3	3		3	no	yes	no	yes	no	no	no	no	no
98	3	23.10.2013	05.01.2014	F	600	1	no	no	no	no		no	no		no	no			5	yes	500	yes	500	no	yes	no	no	2	1	2	1	1	3	1		2	3	3		3	no	yes	no	yes	no	no	no	no	no
99	3	23.10.2013	05.01.2014	F	600	1	no	no	no	no		no	no		no	no			5	yes	500	yes	500	no	yes	no	no	2	1	2	1	1	3	1		2	3	3		3	no	yes	no	yes	no	no	no	no	no
100	3	23.10.2013	05.01.2014	F	600	1	no	no	no	no		no	no		no	no			5	yes	500	yes	500	no	yes	no	no	2	1	2	1	1	3	1		2	3	3		3	no	yes	no	yes	no	no	no	no	no
101	3	23.10.2013	05.01.2014	F	600	1	no	no	no	no		no	no		no	no			5	yes	500	yes	500	no	yes	no	no	2	1	2	1	1	3	1		2	3	3		3	no	yes	no	yes	no	no	no	no	no
102	3	23.10.2013	05.01.2014	F	600	1	no	no	no	no		no	no		no	no			5	yes	500	yes	500	no	yes	no	no	2	1	2	1	1	3	1		2	3	3		3	no	yes	no	yes	no	no	no	no	no
103	3	23.10.2013	05.01.2014	F	600	1	no	no	no	no		no	no		no	no			5	yes	500	yes	500	no	yes	no	no	2	1	2	1	1	3	1		2	3	3		3	no	yes	no	yes	no	no	no	no	no
104	3	23.10.2013	05.01.2014	F	600	1	no	no	no	no		no	no		no	no			5	yes	500	yes	500	no	yes	no	no	2	1	2	1	1	3	1		2	3	3		3	no	yes	no	yes	no	no	no	no	no
105	3	23.10.2013	05.01.2014	F	600	1	no	no	no	no		no	no		no	no			5	yes	500	yes	500	no	yes	no	no	2	1	2	1	1	3	1		2	3	3		3	no	yes	no	yes	no	no	no	no	no
106	3	23.10.2013	05.01.2014	F	600	1	no	no	no	no		no	no		no	no			5	yes	500	yes	500	no	yes	no	no	2	1	2	1	1	3	1		2	3	3		3	no	yes	no	yes	no	no	no	no	no
107	3	23.10.2013	05.01.2014	F	600	1	no	no	no	no		no	no		no	no			5	yes	500	yes	500	no	yes	no	no	2	1	2	1	1	3	1		2	3	3		3	no	yes	no	yes	no	no	no	no	no
108	3	23.10.2013	05.01.2014	F	600	1	no	no	no	no		no	no		no	no			5	yes	500	yes	500	no	yes	no	no	2	1	2	1	1	3	1		2	3	3		3	no	yes	no	yes	no	no	no	no	no
109	3	23.10.2013	05.01.2014	F	600	1	no	no	no	no		no	no		no	no			5	yes	500	yes	500	no	yes	no	no	2	1	2	1	1	3	1		2	3	3		3	no	yes	no	yes	no	no	no	no	no
110	3	23.10.2013	05.01.2014	F	600	1	no	no	no	no		no	no		no	no			5	yes	500	yes	500	no	yes	no	no	2	1	2	1	1	3	1		2	3	3		3	no	yes	no	yes	no	no	no	no	no
111	4	08.11.2013	21.01.2014	FF	496	0	no	yes	yes	no		no	no		no	no			5	no		no		yes	yes	no	yes	2	1	1	1	1	1	1	2	2	2	1	2	2	yes	yes	no	yes	no	no	no	no	no
112	4	08.11.2013	21.01.2014	FF	496	0	no	yes	yes	no		no	no		no	no			5	no		no		yes	yes	no	yes	2	1	1	1	1	1	1	2	2	2	1	2	2	yes	yes	no	yes	no	no	no	no	no
113	4	08.11.2013	21.01.2014	FF	496	0	no	yes	yes	no		no	no		no	no			5	no		no		yes	yes	no	yes	2	1	1	1	1	1	1	2	2	2	1	2	2	yes	yes	no	yes	no	no	no	no	no
114	4	08.11.2013	21.01.2014	FF	496	0	no	yes	yes	no		no	no		no	no			5	no		no		yes	yes	no	yes	2	1	1	1	1	1	1	2	2	2	1	2	2	yes	yes	no	yes	no	no	no	no	no
115	4	08.11.2013	21.01.2014	FF	496	0	no	yes	yes	no		no	no		no	no			5	no		no		yes	yes	no	yes	2	1	1	1	1	1	1	2	2	2	1	2	2	yes	yes	no	yes	no	no	no	no	no
116	4	08.11.2013	21.01.2014	FF	496	0	no	yes	yes	no		no	no		no	no			5	no		no		yes	yes	no	yes	2	1	1	1	1	1	1	2	2	2	1	2	2	yes	yes	no	yes	no	no	no	no	no
117	4	08.11.2013	21.01.2014	FF	496	0	no	yes	yes	no		no	no		no	no			5	no		no		yes	yes	no	yes	2	1	1	1	1	1	1	2	2	2	1	2	2	yes	yes	no	yes	no	no	no	no	no
118	4	08.11.2013	21.01.2014	FF	496	0	no	yes	yes	no		no	no		no	no			5	no		no		yes	yes	no	yes	2	1	1	1	1	1	1	2	2	2	1	2	2	yes	yes	no	yes	no	no	no	no	no
119	4	08.11.2013	21.01.2014	FF	496	0	no	yes	yes	no		no	no		no	no			5	no		no		yes	yes	no	yes	2	1	1	1	1	1	1	2	2	2	1	2	2	yes	yes	no	yes	no	no	no	no	no
120	4	08.11.2013	21.01.2014	FF	496	0	no	yes	yes	no		no	no		no	no			5	no		no		yes	yes	no	yes	2	1	1	1	1	1	1	2	2	2	1	2	2	yes	yes	no	yes	no	no	no	no	no
121	4	08.11.2013	21.01.2014	FF	496	0	no	yes	yes	no		no	no		no	no			5	no		no		yes	yes	no	yes	2	1	1	1	1	1	1	2	2	2	1	2	2	yes	yes	no	yes	no	no	no	no	no
122	4	08.11.2013	21.01.2014	FF	496	0	no	yes	yes	no		no	no		no	no			5	no		no		yes	yes	no	yes	2	1	1	1	1	1	1	2	2	2	1	2	2	yes	yes	no	yes	no	no	no	no	no
123	4	08.11.2013	21.01.2014	FF	496	0	no	yes	yes	no		no	no		no	no			5	no		no		yes	yes	no	yes	2	1	1	1	1	1	1	2	2	2	1	2	2	yes	yes	no	yes	no	no	no	no	no
124	4	08.11.2013	21.01.2014	FF	496	0	no	yes	yes	no		no	no		no	no			5	no		no		yes	yes	no	yes	2	1	1	1	1	1	1	2	2	2	1	2	2	yes	yes	no	yes	no	no	no	no	no
125	4	08.11.2013	21.01.2014	FF	496	0	no	yes	yes	no		no	no		no	no			5	no		no		yes	yes	no	yes	2	1	1	1	1	1	1	2	2	2	1	2	2	yes	yes	no	yes	no	no	no	no	no
126	4	08.11.2013	21.01.2014	FF	496	0	no	yes	yes	no		no	no		no	no			5	no		no		yes	yes	no	yes	2	1	1	1	1	1	1	2	2	2	1	2	2	yes	yes	no	yes	no	no	no	no	no
127	4	08.11.2013	21.01.2014	FF	496	0	no	yes	yes	no		no	no		no	no			5	no		no		yes	yes	no	yes	2	1	1	1	1	1	1	2	2	2	1	2	2	yes	yes	no	yes	no	no	no	no	no
128	4	08.11.2013	21.01.2014	FF	496	0	no	yes	yes	no		no	no		no	no			5	no		no		yes	yes	no	yes	2	1	1	1	1	1	1	2	2	2	1	2	2	yes	yes	no	yes	no	no	no	no	no
129	4	08.11.2013	21.01.2014	FF	496	0	no	yes	yes	no		no	no		no	no			5	no		no		yes	yes	no	yes	2	1	1	1	1	1	1	2	2	2	1	2	2	yes	yes	no	yes	no	no	no	no	no
130	4	08.11.2013	21.01.2014	FF	496	0	no	yes	yes	no		no	no		no	no			5	no		no		yes	yes	no	yes	2	1	1	1	1	1	1	2	2	2	1	2	2	yes	yes	no	yes	no	no	no	no	no
131	5	20.11.2013	28.01.2014	FF	60	0	no	no	yes	yes	2	no	no		no	no		yes	150	yes	50	no		no	no	no	yes	2	1	1	1	1	2	2		2	3	3		3	no	no	no	no	no	no	no	no	no
132	5	20.11.2013	28.01.2014	FF	60	0	no	no	yes	yes	2	no	no		no	no		yes	150	yes	50	no		no	no	no	yes	2	1	1	1	1	2	2		2	3	3		3	no	no	no	no	no	no	no	no	no
133	5	20.11.2013	28.01.2014	FF	60	0	no	no	yes	yes	2	no	no		no	no		yes	150	yes	50	no		no	no	no	yes	2	1	1	1	1	2	2		2	3	3		3	no	no	no	no	no	no	no	no	no
134	5	20.11.2013	28.01.2014	FF	60	0	no	no	yes	yes	2	no	no		no	no		yes	150	yes	50	no		no	no	no	yes	2	1	1	1	1	2	2		2	3	3		3	no	no	no	no	no	no	no	no	no
135	5	20.11.2013	28.01.2014	FF	60	0	no	no	yes	yes	2	no	no		no	no		yes	150	yes	50	no		no	no	no	yes	2	1	1	1	1	2	2		2	3	3		3	no	no	no	no	no	no	no	no	no
136	5	20.11.2013	28.01.2014	FF	60	0	no	no	yes	yes	2	no	no		no	no		yes	150	yes	50	no		no	no	no	yes	2	1	1	1	1	2	2		2	3	3		3	no	no	no	no	no	no	no	no	no
137	5	20.11.2013	28.01.2014	FF	60	0	no	no	yes	yes	2	no	no		no	no		yes	150	yes	50	no		no	no	no	yes	2	1	1	1	1	2	2		2	3	3		3	no	no	no	no	no	no	no	no	no
138	5	20.11.2013	28.01.2014	FF	60	0	no	no	yes	yes	2	no	no		no	no		yes	150	yes	50	no		no	no	no	yes	2	1	1	1	1	2	2		2	3	3		3	no	no	no	no	no	no	no	no	no
139	5	20.11.2013	28.01.2014	FF	60	0	no	no	yes	yes	2	no	no		no	no		yes	150	yes	50	no		no	no	no	yes	2	1	1	1	1	2	2		2	3	3		3	no	no	no	no	no	no	no	no	no
140	5	20.11.2013	28.01.2014	FF	60	0	no	no	yes	yes	2	no	no		no	no		yes	150	yes	50	no		no	no	no	yes	2	1	1	1	1	2	2		2	3	3		3	no	no	no	no	no	no	no	no	no
141	6	25.11.2013	13.02.2014	F	108	1	no	yes	yes	yes	0	yes	no		no	no		yes	200	no		no		yes	no	yes	yes	3	2	1	1	1	2	2	2	2	2	2	3	3	no	yes	no	yes	yes	no	no	no	no
142	6	25.11.2013	13.02.2014	F	108	1	no	yes	yes	yes	0	yes	no		no	no		yes	200	no		no		yes	no	yes	yes	3	2	1	1	1	2	2	2	2	2	2	3	3	no	yes	no	yes	yes	no	no	no	no
143	6	25.11.2013	13.02.2014	F	108	1	no	yes	yes	yes	0	yes	no		no	no		yes	200	no		no		yes	no	yes	yes	3	2	1	1	1	2	2	2	2	2	2	3	3	no	yes	no	yes	yes	no	no	no	no
144	6	25.11.2013	13.02.2014	F	108	1	no	yes	yes	yes	0	yes	no		no	no		yes	200	no		no		yes	no	yes	yes	3	2	1	1	1	2	2	2	2	2	2	3	3	no	yes	no	yes	yes	no	no	no	no
145	6	25.11.2013	13.02.2014	F	108	1	no	yes	yes	yes	0	yes	no		no	no		yes	200	no		no		yes	no	yes	yes	3	2	1	1	1	2	2	2	2	2	2	3	3	no	yes	no	yes	yes	no	no	no	no
146	6	25.11.2013	13.02.2014	F	108	1	no	yes	yes	yes	0	yes	no		no	no		yes	200	no		no		yes	no	yes	yes	3	2	1	1	1	2	2	2	2	2	2	3	3	no	yes	no	yes	yes	no	no	no	no
147	6	25.11.2013	13.02.2014	F	108	1	no	yes	yes	yes	0	yes	no		no	no		yes	200	no		no		yes	no	yes	yes	3	2	1	1	1	2	2	2	2	2	2	3	3	no	yes	no	yes	yes	no	no	no	no
148	6	25.11.2013	13.02.2014	F	108	1	no	yes	yes	yes	0	yes	no		no	no		yes	200	no		no		yes	no	yes	yes	3	2	1	1	1	2	2	2	2	2	2	3	3	no	yes	no	yes	yes	no	no	no	no
149	6	25.11.2013	13.02.2014	F	108	1	no	yes	yes	yes	0	yes	no		no	no		yes	200	no		no		yes	no	yes	yes	3	2	1	1	1	2	2	2	2	2	2	3	3	no	yes	no	yes	yes	no	no	no	no
150	6	25.11.2013	13.02.2014	F	108	1	no	yes	yes	yes	0	yes	no		no	no		yes	200	no		no		yes	no	yes	yes	3	2	1	1	1	2	2	2	2	2	2	3	3	no	yes	no	yes	yes	no	no	no	no
151	6	25.11.2013	13.02.2014	F	108	1	no	yes	yes	yes	0	yes	no		no	no		yes	200	no		no		yes	no	yes	yes	3	2	1	1	1	2	2	2	2	2	2	3	3	no	yes	no	yes	yes	no	no	no	no
152	6	25.11.2013	13.02.2014	F	108	1	no	yes	yes	yes	0	yes	no		no	no		yes	200	no		no		yes	no	yes	yes	3	2	1	1	1	2	2	2	2	2	2	3	3	no	yes	no	yes	yes	no	no	no	no
153	6	25.11.2013	13.02.2014	F	108	1	no	yes	yes	yes	0	yes	no		no	no		yes	200	no		no		yes	no	yes	yes	3	2	1	1	1	2	2	2	2	2	2	3	3	no	yes	no	yes	yes	no	no	no	no
154	6	25.11.2013	13.02.2014	F	108	1	no	yes	yes	yes	0	yes	no		no	no		yes	200	no		no		yes	no	yes	yes	3	2	1	1	1	2	2	2	2	2	2	3	3	no	yes	no	yes	yes	no	no	no	no
155	6	25.11.2013	13.02.2014	F	108	1	no	yes	yes	yes	0	yes	no		no	no		yes	200	no		no		yes	no	yes	yes	3	2	1	1	1	2	2	2	2	2	2	3	3	no	yes	no	yes	yes	no	no	no	no
156	6	25.11.2013	13.02.2014	F	108	1	no	yes	yes	yes	0	yes	no		no	no		yes	200	no		no		yes	no	yes	yes	3	2	1	1	1	2	2	2	2	2	2	3	3	no	yes	no	yes	yes	no	no	no	no
157	6	25.11.2013	13.02.2014	F	108	1	no	yes	yes	yes	0	yes	no		no	no		yes	200	no		no		yes	no	yes	yes	3	2	1	1	1	2	2	2	2	2	2	3	3	no	yes	no	yes	yes	no	no	no	no
158	6	25.11.2013	13.02.2014	F	108	1	no	yes	yes	yes	0	yes	no		no	no		yes	200	no		no		yes	no	yes	yes	3	2	1	1	1	2	2	2	2	2	2	3	3	no	yes	no	yes	yes	no	no	no	no
159	6	25.11.2013	13.02.2014	F	108	1	no	yes	yes	yes	0	yes	no		no	no		yes	200	no		no		yes	no	yes	yes	3	2	1	1	1	2	2	2	2	2	2	3	3	no	yes	no	yes	yes	no	no	no	no
160	6	25.11.2013	13.02.2014	F	108	1	no	yes	yes	yes	0	yes	no		no	no		yes	200	no		no		yes	no	yes	yes	3	2	1	1	1	2	2	2	2	2	2	3	3	no	yes	no	yes	yes	no	no	no	no
161	7	02.12.2013	18.02.2014	F	115	2	yes	yes	no	yes	5	no	no		no	no		yes	1000	yes	1000	no		no	yes	no	yes	3	2	1	1	2	2	2	2	2	3	3	2	3	no	yes	no	yes	yes	no	no	no	yes
162	7	02.12.2013	18.02.2014	F	115	2	yes	yes	no	yes	5	no	no		no	no		yes	1000	yes	1000	no		no	yes	no	yes	3	2	1	1	2	2	2	2	2	3	3	2	3	no	yes	no	yes	yes	no	no	no	yes
163	7	02.12.2013	18.02.2014	F	115	2	yes	yes	no	yes	5	no	no		no	no		yes	1000	yes	1000	no		no	yes	no	yes	3	2	1	1	2	2	2	2	2	3	3	2	3	no	yes	no	yes	yes	no	no	no	yes
164	7	02.12.2013	18.02.2014	F	115	2	yes	yes	no	yes	5	no	no		no	no		yes	1000	yes	1000	no		no	yes	no	yes	3	2	1	1	2	2	2	2	2	3	3	2	3	no	yes	no	yes	yes	no	no	no	yes
165	7	02.12.2013	18.02.2014	F	115	2	yes	yes	no	yes	5	no	no		no	no		yes	1000	yes	1000	no		no	yes	no	yes	3	2	1	1	2	2	2	2	2	3	3	2	3	no	yes	no	yes	yes	no	no	no	yes
166	7	02.12.2013	18.02.2014	F	115	2	yes	yes	no	yes	5	no	no		no	no		yes	1000	yes	1000	no		no	yes	no	yes	3	2	1	1	2	2	2	2	2	3	3	2	3	no	yes	no	yes	yes	no	no	no	yes
167	7	02.12.2013	18.02.2014	F	115	2	yes	yes	no	yes	5	no	no		no	no		yes	1000	yes	1000	no		no	yes	no	yes	3	2	1	1	2	2	2	2	2	3	3	2	3	no	yes	no	yes	yes	no	no	no	yes
168	7	02.12.2013	18.02.2014	F	115	2	yes	yes	no	yes	5	no	no		no	no		yes	1000	yes	1000	no		no	yes	no	yes	3	2	1	1	2	2	2	2	2	3	3	2	3	no	yes	no	yes	yes	no	no	no	yes
169	7	02.12.2013	18.02.2014	F	115	2	yes	yes	no	yes	5	no	no		no	no		yes	1000	yes	1000	no		no	yes	no	yes	3	2	1	1	2	2	2	2	2	3	3	2	3	no	yes	no	yes	yes	no	no	no	yes
170	7	02.12.2013	18.02.2014	F	115	2	yes	yes	no	yes	5	no	no		no	no		yes	1000	yes	1000	no		no	yes	no	yes	3	2	1	1	2	2	2	2	2	3	3	2	3	no	yes	no	yes	yes	no	no	no	yes
171	7	02.12.2013	18.02.2014	F	115	2	yes	yes	no	yes	5	no	no		no	no		yes	1000	yes	1000	no		no	yes	no	yes	3	2	1	1	2	2	2	2	2	3	3	2	3	no	yes	no	yes	yes	no	no	no	yes
172	7	02.12.2013	18.02.2014	F	115	2	yes	yes	no	yes	5	no	no		no	no		yes	1000	yes	1000	no		no	yes	no	yes	3	2	1	1	2	2	2	2	2	3	3	2	3	no	yes	no	yes	yes	no	no	no	yes
173	7	02.12.2013	18.02.2014	F	115	2	yes	yes	no	yes	5	no	no		no	no		yes	1000	yes	1000	no		no	yes	no	yes	3	2	1	1	2	2	2	2	2	3	3	2	3	no	yes	no	yes	yes	no	no	no	yes
174	7	02.12.2013	18.02.2014	F	115	2	yes	yes	no	yes	5	no	no		no	no		yes	1000	yes	1000	no		no	yes	no	yes	3	2	1	1	2	2	2	2	2	3	3	2	3	no	yes	no	yes	yes	no	no	no	yes
175	7	02.12.2013	18.02.2014	F	115	2	yes	yes	no	yes	5	no	no		no	no		yes	1000	yes	1000	no		no	yes	no	yes	3	2	1	1	2	2	2	2	2	3	3	2	3	no	yes	no	yes	yes	no	no	no	yes
176	7	02.12.2013	18.02.2014	F	115	2	yes	yes	no	yes	5	no	no		no	no		yes	1000	yes	1000	no		no	yes	no	yes	3	2	1	1	2	2	2	2	2	3	3	2	3	no	yes	no	yes	yes	no	no	no	yes
177	7	02.12.2013	18.02.2014	F	115	2	yes	yes	no	yes	5	no	no		no	no		yes	1000	yes	1000	no		no	yes	no	yes	3	2	1	1	2	2	2	2	2	3	3	2	3	no	yes	no	yes	yes	no	no	no	yes
178	7	02.12.2013	18.02.2014	F	115	2	yes	yes	no	yes	5	no	no		no	no		yes	1000	yes	1000	no		no	yes	no	yes	3	2	1	1	2	2	2	2	2	3	3	2	3	no	yes	no	yes	yes	no	no	no	yes
179	7	02.12.2013	18.02.2014	F	115	2	yes	yes	no	yes	5	no	no		no	no		yes	1000	yes	1000	no		no	yes	no	yes	3	2	1	1	2	2	2	2	2	3	3	2	3	no	yes	no	yes	yes	no	no	no	yes
180	7	02.12.2013	18.02.2014	F	115	2	yes	yes	no	yes	5	no	no		no	no		yes	1000	yes	1000	no		no	yes	no	yes	3	2	1	1	2	2	2	2	2	3	3	2	3	no	yes	no	yes	yes	no	no	no	yes
181	8	05.12.2013		FF	220	0	no	yes	yes	yes	30	no	no		no	no		yes	50	yes	100	no		no	yes	no	yes	3	1	1	1		1	1	1	1
182	8	05.12.2013		FF	220	0	no	yes	yes	yes	30	no	no		no	no		yes	50	yes	100	no		no	yes	no	yes	3	1	1	1		1	1	1	1
183	8	05.12.2013		FF	220	0	no	yes	yes	yes	30	no	no		no	no		yes	50	yes	100	no		no	yes	no	yes	3	1	1	1		1	1	1	1
184	8	05.12.2013		FF	220	0	no	yes	yes	yes	30	no	no		no	no		yes	50	yes	100	no		no	yes	no	yes	3	1	1	1		1	1	1	1
185	8	05.12.2013		FF	220	0	no	yes	yes	yes	30	no	no		no	no		yes	50	yes	100	no		no	yes	no	yes	3	1	1	1		1	1	1	1
186	8	05.12.2013		FF	220	0	no	yes	yes	yes	30	no	no		no	no		yes	50	yes	100	no		no	yes	no	yes	3	1	1	1		1	1	1	1
187	8	05.12.2013		FF	220	0	no	yes	yes	yes	30	no	no		no	no		yes	50	yes	100	no		no	yes	no	yes	3	1	1	1		1	1	1	1
188	8	05.12.2013		FF	220	0	no	yes	yes	yes	30	no	no		no	no		yes	50	yes	100	no		no	yes	no	yes	3	1	1	1		1	1	1	1
189	8	05.12.2013		FF	220	0	no	yes	yes	yes	30	no	no		no	no		yes	50	yes	100	no		no	yes	no	yes	3	1	1	1		1	1	1	1
190	8	05.12.2013		FF	220	0	no	yes	yes	yes	30	no	no		no	no		yes	50	yes	100	no		no	yes	no	yes	3	1	1	1		1	1	1	1
191	8	05.12.2013		FF	220	0	no	yes	yes	yes	30	no	no		no	no		yes	50	yes	100	no		no	yes	no	yes	3	1	1	1		1	1	1	1
192	8	05.12.2013		FF	220	0	no	yes	yes	yes	30	no	no		no	no		yes	50	yes	100	no		no	yes	no	yes	3	1	1	1		1	1	1	1
193	8	05.12.2013		FF	220	0	no	yes	yes	yes	30	no	no		no	no		yes	50	yes	100	no		no	yes	no	yes	3	1	1	1		1	1	1	1
194	8	05.12.2013		FF	220	0	no	yes	yes	yes	30	no	no		no	no		yes	50	yes	100	no		no	yes	no	yes	3	1	1	1		1	1	1	1
195	8	05.12.2013		FF	220	0	no	yes	yes	yes	30	no	no		no	no		yes	50	yes	100	no		no	yes	no	yes	3	1	1	1		1	1	1	1
196	8	05.12.2013		FF	220	0	no	yes	yes	yes	30	no	no		no	no		yes	50	yes	100	no		no	yes	no	yes	3	1	1	1		1	1	1	1
197	8	05.12.2013		FF	220	0	no	yes	yes	yes	30	no	no		no	no		yes	50	yes	100	no		no	yes	no	yes	3	1	1	1		1	1	1	1
198	8	05.12.2013		FF	220	0	no	yes	yes	yes	30	no	no		no	no		yes	50	yes	100	no		no	yes	no	yes	3	1	1	1		1	1	1	1
199	8	05.12.2013		FF	220	0	no	yes	yes	yes	30	no	no		no	no		yes	50	yes	100	no		no	yes	no	yes	3	1	1	1		1	1	1	1
200	8	05.12.2013		FF	220	0	no	yes	yes	yes	30	no	no		no	no		yes	50	yes	100	no		no	yes	no	yes	3	1	1	1		1	1	1	1
201	9	20.12.2013	31.03.2014	F	200	1	no	yes	yes	yes	10	no	no		no	yes	10	yes	150	yes	1000	yes	150	yes	yes	no	yes	3	1	2	1	2	3	2	2	3	3	2	2	3	yes	no	no	no	yes	yes	yes	yes	no
202	9	20.12.2013	31.03.2014	F	200	1	no	yes	yes	yes	10	no	no		no	yes	10	yes	150	yes	1000	yes	150	yes	yes	no	yes	3	1	2	1	2	3	2	2	3	3	2	2	3	yes	no	no	no	yes	yes	yes	yes	no
203	9	20.12.2013	31.03.2014	F	200	1	no	yes	yes	yes	10	no	no		no	yes	10	yes	150	yes	1000	yes	150	yes	yes	no	yes	3	1	2	1	2	3	2	2	3	3	2	2	3	yes	no	no	no	yes	yes	yes	yes	no
204	9	20.12.2013	31.03.2014	F	200	1	no	yes	yes	yes	10	no	no		no	yes	10	yes	150	yes	1000	yes	150	yes	yes	no	yes	3	1	2	1	2	3	2	2	3	3	2	2	3	yes	no	no	no	yes	yes	yes	yes	no
205	9	20.12.2013	31.03.2014	F	200	1	no	yes	yes	yes	10	no	no		no	yes	10	yes	150	yes	1000	yes	150	yes	yes	no	yes	3	1	2	1	2	3	2	2	3	3	2	2	3	yes	no	no	no	yes	yes	yes	yes	no
206	9	20.12.2013	31.03.2014	F	200	1	no	yes	yes	yes	10	no	no		no	yes	10	yes	150	yes	1000	yes	150	yes	yes	no	yes	3	1	2	1	2	3	2	2	3	3	2	2	3	yes	no	no	no	yes	yes	yes	yes	no
207	9	20.12.2013	31.03.2014	F	200	1	no	yes	yes	yes	10	no	no		no	yes	10	yes	150	yes	1000	yes	150	yes	yes	no	yes	3	1	2	1	2	3	2	2	3	3	2	2	3	yes	no	no	no	yes	yes	yes	yes	no
208	9	20.12.2013	31.03.2014	F	200	1	no	yes	yes	yes	10	no	no		no	yes	10	yes	150	yes	1000	yes	150	yes	yes	no	yes	3	1	2	1	2	3	2	2	3	3	2	2	3	yes	no	no	no	yes	yes	yes	yes	no
209	9	20.12.2013	31.03.2014	F	200	1	no	yes	yes	yes	10	no	no		no	yes	10	yes	150	yes	1000	yes	150	yes	yes	no	yes	3	1	2	1	2	3	2	2	3	3	2	2	3	yes	no	no	no	yes	yes	yes	yes	no
210	9	20.12.2013	31.03.2014	F	200	1	no	yes	yes	yes	10	no	no		no	yes	10	yes	150	yes	1000	yes	150	yes	yes	no	yes	3	1	2	1	2	3	2	2	3	3	2	2	3	yes	no	no	no	yes	yes	yes	yes	no
211	9	20.12.2013	31.03.2014	F	200	1	no	yes	yes	yes	10	no	no		no	yes	10	yes	150	yes	1000	yes	150	yes	yes	no	yes	3	1	2	1	2	3	2	2	3	3	2	2	3	yes	no	no	no	yes	yes	yes	yes	no
212	9	20.12.2013	31.03.2014	F	200	1	no	yes	yes	yes	10	no	no		no	yes	10	yes	150	yes	1000	yes	150	yes	yes	no	yes	3	1	2	1	2	3	2	2	3	3	2	2	3	yes	no	no	no	yes	yes	yes	yes	no
213	9	20.12.2013	31.03.2014	F	200	1	no	yes	yes	yes	10	no	no		no	yes	10	yes	150	yes	1000	yes	150	yes	yes	no	yes	3	1	2	1	2	3	2	2	3	3	2	2	3	yes	no	no	no	yes	yes	yes	yes	no
214	9	20.12.2013	31.03.2014	F	200	1	no	yes	yes	yes	10	no	no		no	yes	10	yes	150	yes	1000	yes	150	yes	yes	no	yes	3	1	2	1	2	3	2	2	3	3	2	2	3	yes	no	no	no	yes	yes	yes	yes	no
215	9	20.12.2013	31.03.2014	F	200	1	no	yes	yes	yes	10	no	no		no	yes	10	yes	150	yes	1000	yes	150	yes	yes	no	yes	3	1	2	1	2	3	2	2	3	3	2	2	3	yes	no	no	no	yes	yes	yes	yes	no
216	9	20.12.2013	31.03.2014	F	200	1	no	yes	yes	yes	10	no	no		no	yes	10	yes	150	yes	1000	yes	150	yes	yes	no	yes	3	1	2	1	2	3	2	2	3	3	2	2	3	yes	no	no	no	yes	yes	yes	yes	no
217	9	20.12.2013	31.03.2014	F	200	1	no	yes	yes	yes	10	no	no		no	yes	10	yes	150	yes	1000	yes	150	yes	yes	no	yes	3	1	2	1	2	3	2	2	3	3	2	2	3	yes	no	no	no	yes	yes	yes	yes	no
218	9	20.12.2013	31.03.2014	F	200	1	no	yes	yes	yes	10	no	no		no	yes	10	yes	150	yes	1000	yes	150	yes	yes	no	yes	3	1	2	1	2	3	2	2	3	3	2	2	3	yes	no	no	no	yes	yes	yes	yes	no
219	9	20.12.2013	31.03.2014	F	200	1	no	yes	yes	yes	10	no	no		no	yes	10	yes	150	yes	1000	yes	150	yes	yes	no	yes	3	1	2	1	2	3	2	2	3	3	2	2	3	yes	no	no	no	yes	yes	yes	yes	no
220	9	20.12.2013	31.03.2014	F	200	1	no	yes	yes	yes	10	no	no		no	yes	10	yes	150	yes	1000	yes	150	yes	yes	no	yes	3	1	2	1	2	3	2	2	3	3	2	2	3	yes	no	no	no	yes	yes	yes	yes	no
221	9	20.12.2013	31.03.2014	F	200	1	no	yes	yes	yes	10	no	no		no	yes	10	yes	150	yes	1000	yes	150	yes	yes	no	yes	3	1	2	1	2	3	2	2	3	3	2	2	3	yes	no	no	no	yes	yes	yes	yes	no
222	9	20.12.2013	31.03.2014	F	200	1	no	yes	yes	yes	10	no	no		no	yes	10	yes	150	yes	1000	yes	150	yes	yes	no	yes	3	1	2	1	2	3	2	2	3	3	2	2	3	yes	no	no	no	yes	yes	yes	yes	no
223	9	20.12.2013	31.03.2014	F	200	1	no	yes	yes	yes	10	no	no		no	yes	10	yes	150	yes	1000	yes	150	yes	yes	no	yes	3	1	2	1	2	3	2	2	3	3	2	2	3	yes	no	no	no	yes	yes	yes	yes	no
224	9	20.12.2013	31.03.2014	F	200	1	no	yes	yes	yes	10	no	no		no	yes	10	yes	150	yes	1000	yes	150	yes	yes	no	yes	3	1	2	1	2	3	2	2	3	3	2	2	3	yes	no	no	no	yes	yes	yes	yes	no
225	9	20.12.2013	31.03.2014	F	200	1	no	yes	yes	yes	10	no	no		no	yes	10	yes	150	yes	1000	yes	150	yes	yes	no	yes	3	1	2	1	2	3	2	2	3	3	2	2	3	yes	no	no	no	yes	yes	yes	yes	no
226	9	20.12.2013	31.03.2014	F	200	1	no	yes	yes	yes	10	no	no		no	yes	10	yes	150	yes	1000	yes	150	yes	yes	no	yes	3	1	2	1	2	3	2	2	3	3	2	2	3	yes	no	no	no	yes	yes	yes	yes	no
227	9	20.12.2013	31.03.2014	F	200	1	no	yes	yes	yes	10	no	no		no	yes	10	yes	150	yes	1000	yes	150	yes	yes	no	yes	3	1	2	1	2	3	2	2	3	3	2	2	3	yes	no	no	no	yes	yes	yes	yes	no
228	9	20.12.2013	31.03.2014	F	200	1	no	yes	yes	yes	10	no	no		no	yes	10	yes	150	yes	1000	yes	150	yes	yes	no	yes	3	1	2	1	2	3	2	2	3	3	2	2	3	yes	no	no	no	yes	yes	yes	yes	no
229	9	20.12.2013	31.03.2014	F	200	1	no	yes	yes	yes	10	no	no		no	yes	10	yes	150	yes	1000	yes	150	yes	yes	no	yes	3	1	2	1	2	3	2	2	3	3	2	2	3	yes	no	no	no	yes	yes	yes	yes	no
230	9	20.12.2013	31.03.2014	F	200	1	no	yes	yes	yes	10	no	no		no	yes	10	yes	150	yes	1000	yes	150	yes	yes	no	yes	3	1	2	1	2	3	2	2	3	3	2	2	3	yes	no	no	no	yes	yes	yes	yes	no
231	9	20.12.2013	31.03.2014	F	200	1	no	yes	yes	yes	10	no	no		no	yes	10	yes	150	yes	1000	yes	150	yes	yes	no	yes	3	1	2	1	2	3	2	2	3	3	2	2	3	yes	no	no	no	yes	yes	yes	yes	no
232	9	20.12.2013	31.03.2014	F	200	1	no	yes	yes	yes	10	no	no		no	yes	10	yes	150	yes	1000	yes	150	yes	yes	no	yes	3	1	2	1	2	3	2	2	3	3	2	2	3	yes	no	no	no	yes	yes	yes	yes	no
233	9	20.12.2013	31.03.2014	F	200	1	no	yes	yes	yes	10	no	no		no	yes	10	yes	150	yes	1000	yes	150	yes	yes	no	yes	3	1	2	1	2	3	2	2	3	3	2	2	3	yes	no	no	no	yes	yes	yes	yes	no
234	9	20.12.2013	31.03.2014	F	200	1	no	yes	yes	yes	10	no	no		no	yes	10	yes	150	yes	1000	yes	150	yes	yes	no	yes	3	1	2	1	2	3	2	2	3	3	2	2	3	yes	no	no	no	yes	yes	yes	yes	no
235	9	20.12.2013	31.03.2014	F	200	1	no	yes	yes	yes	10	no	no		no	yes	10	yes	150	yes	1000	yes	150	yes	yes	no	yes	3	1	2	1	2	3	2	2	3	3	2	2	3	yes	no	no	no	yes	yes	yes	yes	no
236	9	20.12.2013	31.03.2014	F	200	1	no	yes	yes	yes	10	no	no		no	yes	10	yes	150	yes	1000	yes	150	yes	yes	no	yes	3	1	2	1	2	3	2	2	3	3	2	2	3	yes	no	no	no	yes	yes	yes	yes	no
237	10	27.01.2014		FF	170	0	no	no	no	yes	50	no	no		no	no		no	50	yes	100	no		yes	yes	no	no	3	1	2	1		2	3		3									no	no	no	no	no
238	10	27.01.2014		FF	170	0	no	no	no	yes	50	no	no		no	no		no	50	yes	100	no		yes	yes	no	no	3	1	2	1		2	3		3									no	no	no	no	no
239	10	27.01.2014		FF	170	0	no	no	no	yes	50	no	no		no	no		no	50	yes	100	no		yes	yes	no	no	3	1	2	1		2	3		3									no	no	no	no	no
240	10	27.01.2014		FF	170	0	no	no	no	yes	50	no	no		no	no		no	50	yes	100	no		yes	yes	no	no	3	1	2	1		2	3		3									no	no	no	no	no
241	10	27.01.2014		FF	170	0	no	no	no	yes	50	no	no		no	no		no	50	yes	100	no		yes	yes	no	no	3	1	2	1		2	3		3									no	no	no	no	no
242	10	27.01.2014		FF	170	0	no	no	no	yes	50	no	no		no	no		no	50	yes	100	no		yes	yes	no	no	3	1	2	1		2	3		3									no	no	no	no	no
243	10	27.01.2014		FF	170	0	no	no	no	yes	50	no	no		no	no		no	50	yes	100	no		yes	yes	no	no	3	1	2	1		2	3		3									no	no	no	no	no
244	10	27.01.2014		FF	170	0	no	no	no	yes	50	no	no		no	no		no	50	yes	100	no		yes	yes	no	no	3	1	2	1		2	3		3									no	no	no	no	no
245	10	27.01.2014		FF	170	0	no	no	no	yes	50	no	no		no	no		no	50	yes	100	no		yes	yes	no	no	3	1	2	1		2	3		3									no	no	no	no	no
246	10	27.01.2014		FF	170	0	no	no	no	yes	50	no	no		no	no		no	50	yes	100	no		yes	yes	no	no	3	1	2	1		2	3		3									no	no	no	no	no
247	10	27.01.2014		FF	170	0	no	no	no	yes	50	no	no		no	no		no	50	yes	100	no		yes	yes	no	no	3	1	2	1		2	3		3									no	no	no	no	no
248	10	27.01.2014		FF	170	0	no	no	no	yes	50	no	no		no	no		no	50	yes	100	no		yes	yes	no	no	3	1	2	1		2	3		3									no	no	no	no	no
249	10	27.01.2014		FF	170	0	no	no	no	yes	50	no	no		no	no		no	50	yes	100	no		yes	yes	no	no	3	1	2	1		2	3		3									no	no	no	no	no
250	10	27.01.2014		FF	170	0	no	no	no	yes	50	no	no		no	no		no	50	yes	100	no		yes	yes	no	no	3	1	2	1		2	3		3									no	no	no	no	no
251	10	27.01.2014		FF	170	0	no	no	no	yes	50	no	no		no	no		no	50	yes	100	no		yes	yes	no	no	3	1	2	1		2	3		3									no	no	no	no	no
252	10	27.01.2014		FF	170	0	no	no	no	yes	50	no	no		no	no		no	50	yes	100	no		yes	yes	no	no	3	1	2	1		2	3		3									no	no	no	no	no
253	10	27.01.2014		FF	170	0	no	no	no	yes	50	no	no		no	no		no	50	yes	100	no		yes	yes	no	no	3	1	2	1		2	3		3									no	no	no	no	no
254	10	27.01.2014		FF	170	0	no	no	no	yes	50	no	no		no	no		no	50	yes	100	no		yes	yes	no	no	3	1	2	1		2	3		3									no	no	no	no	no
255	10	27.01.2014		FF	170	0	no	no	no	yes	50	no	no		no	no		no	50	yes	100	no		yes	yes	no	no	3	1	2	1		2	3		3									no	no	no	no	no
256	10	27.01.2014		FF	170	0	no	no	no	yes	50	no	no		no	no		no	50	yes	100	no		yes	yes	no	no	3	1	2	1		2	3		3									no	no	no	no	no
257	11	10.02.2014	29.04.2014	F	245	2	no	yes	yes	yes	2	no	no		no	yes	10	yes	30	no		no		no	no	no	yes	2	1	1	1	2	1	1	2	2	2	1	2	2	yes	yes	yes	yes	no	no	no	no	no
258	11	10.02.2014	29.04.2014	F	245	2	no	yes	yes	yes	2	no	no		no	yes	10	yes	30	no		no		no	no	no	yes	2	1	1	1	2	1	1	2	2	2	1	2	2	yes	yes	yes	yes	no	no	no	no	no
259	11	10.02.2014	29.04.2014	F	245	2	no	yes	yes	yes	2	no	no		no	yes	10	yes	30	no		no		no	no	no	yes	2	1	1	1	2	1	1	2	2	2	1	2	2	yes	yes	yes	yes	no	no	no	no	no
260	11	10.02.2014	29.04.2014	F	245	2	no	yes	yes	yes	2	no	no		no	yes	10	yes	30	no		no		no	no	no	yes	2	1	1	1	2	1	1	2	2	2	1	2	2	yes	yes	yes	yes	no	no	no	no	no
261	11	10.02.2014	29.04.2014	F	245	2	no	yes	yes	yes	2	no	no		no	yes	10	yes	30	no		no		no	no	no	yes	2	1	1	1	2	1	1	2	2	2	1	2	2	yes	yes	yes	yes	no	no	no	no	no
262	11	10.02.2014	29.04.2014	F	245	2	no	yes	yes	yes	2	no	no		no	yes	10	yes	30	no		no		no	no	no	yes	2	1	1	1	2	1	1	2	2	2	1	2	2	yes	yes	yes	yes	no	no	no	no	no
263	11	10.02.2014	29.04.2014	F	245	2	no	yes	yes	yes	2	no	no		no	yes	10	yes	30	no		no		no	no	no	yes	2	1	1	1	2	1	1	2	2	2	1	2	2	yes	yes	yes	yes	no	no	no	no	no
264	11	10.02.2014	29.04.2014	F	245	2	no	yes	yes	yes	2	no	no		no	yes	10	yes	30	no		no		no	no	no	yes	2	1	1	1	2	1	1	2	2	2	1	2	2	yes	yes	yes	yes	no	no	no	no	no
265	11	10.02.2014	29.04.2014	F	245	2	no	yes	yes	yes	2	no	no		no	yes	10	yes	30	no		no		no	no	no	yes	2	1	1	1	2	1	1	2	2	2	1	2	2	yes	yes	yes	yes	no	no	no	no	no
266	11	10.02.2014	29.04.2014	F	245	2	no	yes	yes	yes	2	no	no		no	yes	10	yes	30	no		no		no	no	no	yes	2	1	1	1	2	1	1	2	2	2	1	2	2	yes	yes	yes	yes	no	no	no	no	no
267	11	10.02.2014	29.04.2014	F	245	2	no	yes	yes	yes	2	no	no		no	yes	10	yes	30	no		no		no	no	no	yes	2	1	1	1	2	1	1	2	2	2	1	2	2	yes	yes	yes	yes	no	no	no	no	no
268	11	10.02.2014	29.04.2014	F	245	2	no	yes	yes	yes	2	no	no		no	yes	10	yes	30	no		no		no	no	no	yes	2	1	1	1	2	1	1	2	2	2	1	2	2	yes	yes	yes	yes	no	no	no	no	no
269	11	10.02.2014	29.04.2014	F	245	2	no	yes	yes	yes	2	no	no		no	yes	10	yes	30	no		no		no	no	no	yes	2	1	1	1	2	1	1	2	2	2	1	2	2	yes	yes	yes	yes	no	no	no	no	no
270	11	10.02.2014	29.04.2014	F	245	2	no	yes	yes	yes	2	no	no		no	yes	10	yes	30	no		no		no	no	no	yes	2	1	1	1	2	1	1	2	2	2	1	2	2	yes	yes	yes	yes	no	no	no	no	no
271	11	10.02.2014	29.04.2014	F	245	2	no	yes	yes	yes	2	no	no		no	yes	10	yes	30	no		no		no	no	no	yes	2	1	1	1	2	1	1	2	2	2	1	2	2	yes	yes	yes	yes	no	no	no	no	no
272	11	10.02.2014	29.04.2014	F	245	2	no	yes	yes	yes	2	no	no		no	yes	10	yes	30	no		no		no	no	no	yes	2	1	1	1	2	1	1	2	2	2	1	2	2	yes	yes	yes	yes	no	no	no	no	no
273	11	10.02.2014	29.04.2014	F	245	2	no	yes	yes	yes	2	no	no		no	yes	10	yes	30	no		no		no	no	no	yes	2	1	1	1	2	1	1	2	2	2	1	2	2	yes	yes	yes	yes	no	no	no	no	no
274	11	10.02.2014	29.04.2014	F	245	2	no	yes	yes	yes	2	no	no		no	yes	10	yes	30	no		no		no	no	no	yes	2	1	1	1	2	1	1	2	2	2	1	2	2	yes	yes	yes	yes	no	no	no	no	no
275	11	10.02.2014	29.04.2014	F	245	2	no	yes	yes	yes	2	no	no		no	yes	10	yes	30	no		no		no	no	no	yes	2	1	1	1	2	1	1	2	2	2	1	2	2	yes	yes	yes	yes	no	no	no	no	no
276	11	10.02.2014	29.04.2014	F	245	2	no	yes	yes	yes	2	no	no		no	yes	10	yes	30	no		no		no	no	no	yes	2	1	1	1	2	1	1	2	2	2	1	2	2	yes	yes	yes	yes	no	no	no	no	no
277	12	11.02.2014	02.05.2014	FF	60	0	yes	no	no	yes	30	no	no		no	no		no	500	no		no		no	no	no	yes	1	2	1	1	2	1	1		1	2	3		3	no	yes	no	no	no	no	no	no	no
278	12	11.02.2014	02.05.2014	FF	60	0	yes	no	no	yes	30	no	no		no	no		no	500	no		no		no	no	no	yes	1	2	1	1	2	1	1		1	2	3		3	no	yes	no	no	no	no	no	no	no
279	12	11.02.2014	02.05.2014	FF	60	0	yes	no	no	yes	30	no	no		no	no		no	500	no		no		no	no	no	yes	1	2	1	1	2	1	1		1	2	3		3	no	yes	no	no	no	no	no	no	no
280	12	11.02.2014	02.05.2014	FF	60	0	yes	no	no	yes	30	no	no		no	no		no	500	no		no		no	no	no	yes	1	2	1	1	2	1	1		1	2	3		3	no	yes	no	no	no	no	no	no	no
281	12	11.02.2014	02.05.2014	FF	60	0	yes	no	no	yes	30	no	no		no	no		no	500	no		no		no	no	no	yes	1	2	1	1	2	1	1		1	2	3		3	no	yes	no	no	no	no	no	no	no
282	12	11.02.2014	02.05.2014	FF	60	0	yes	no	no	yes	30	no	no		no	no		no	500	no		no		no	no	no	yes	1	2	1	1	2	1	1		1	2	3		3	no	yes	no	no	no	no	no	no	no
283	12	11.02.2014	02.05.2014	FF	60	0	yes	no	no	yes	30	no	no		no	no		no	500	no		no		no	no	no	yes	1	2	1	1	2	1	1		1	2	3		3	no	yes	no	no	no	no	no	no	no
284	12	11.02.2014	02.05.2014	FF	60	0	yes	no	no	yes	30	no	no		no	no		no	500	no		no		no	no	no	yes	1	2	1	1	2	1	1		1	2	3		3	no	yes	no	no	no	no	no	no	no
285	12	11.02.2014	02.05.2014	FF	60	0	yes	no	no	yes	30	no	no		no	no		no	500	no		no		no	no	no	yes	1	2	1	1	2	1	1		1	2	3		3	no	yes	no	no	no	no	no	no	no
286	12	11.02.2014	02.05.2014	FF	60	0	yes	no	no	yes	30	no	no		no	no		no	500	no		no		no	no	no	yes	1	2	1	1	2	1	1		1	2	3		3	no	yes	no	no	no	no	no	no	no
287	12	11.02.2014	02.05.2014	FF	60	0	yes	no	no	yes	30	no	no		no	no		no	500	no		no		no	no	no	yes	1	2	1	1	2	1	1		1	2	3		3	no	yes	no	no	no	no	no	no	no
288	12	11.02.2014	02.05.2014	FF	60	0	yes	no	no	yes	30	no	no		no	no		no	500	no		no		no	no	no	yes	1	2	1	1	2	1	1		1	2	3		3	no	yes	no	no	no	no	no	no	no
289	12	11.02.2014	02.05.2014	FF	60	0	yes	no	no	yes	30	no	no		no	no		no	500	no		no		no	no	no	yes	1	2	1	1	2	1	1		1	2	3		3	no	yes	no	no	no	no	no	no	no
290	12	11.02.2014	02.05.2014	FF	60	0	yes	no	no	yes	30	no	no		no	no		no	500	no		no		no	no	no	yes	1	2	1	1	2	1	1		1	2	3		3	no	yes	no	no	no	no	no	no	no
291	12	11.02.2014	02.05.2014	FF	60	0	yes	no	no	yes	30	no	no		no	no		no	500	no		no		no	no	no	yes	1	2	1	1	2	1	1		1	2	3		3	no	yes	no	no	no	no	no	no	no
292	12	11.02.2014	02.05.2014	FF	60	0	yes	no	no	yes	30	no	no		no	no		no	500	no		no		no	no	no	yes	1	2	1	1	2	1	1		1	2	3		3	no	yes	no	no	no	no	no	no	no
293	12	11.02.2014	02.05.2014	FF	60	0	yes	no	no	yes	30	no	no		no	no		no	500	no		no		no	no	no	yes	1	2	1	1	2	1	1		1	2	3		3	no	yes	no	no	no	no	no	no	no
294	12	11.02.2014	02.05.2014	FF	60	0	yes	no	no	yes	30	no	no		no	no		no	500	no		no		no	no	no	yes	1	2	1	1	2	1	1		1	2	3		3	no	yes	no	no	no	no	no	no	no
295	12	11.02.2014	02.05.2014	FF	60	0	yes	no	no	yes	30	no	no		no	no		no	500	no		no		no	no	no	yes	1	2	1	1	2	1	1		1	2	3		3	no	yes	no	no	no	no	no	no	no
296	12	11.02.2014	02.05.2014	FF	60	0	yes	no	no	yes	30	no	no		no	no		no	500	no		no		no	no	no	yes	1	2	1	1	2	1	1		1	2	3		3	no	yes	no	no	no	no	no	no	no
297	13	25.02.2014	16.05.2014	F	180	2	yes	yes	yes	yes	20	no	yes	50	no	no		yes	300	yes	500	no		no	no	no	yes	2	2	1	1	1	1	1	1	1	2	1	2	2	no	yes	no	yes	no	no	no	no	no
298	13	25.02.2014	16.05.2014	F	180	2	yes	yes	yes	yes	20	no	yes	50	no	no		yes	300	yes	500	no		no	no	no	yes	2	2	1	1	1	1	1	1	1	2	1	2	2	no	yes	no	yes	no	no	no	no	no
299	13	25.02.2014	16.05.2014	F	180	2	yes	yes	yes	yes	20	no	yes	50	no	no		yes	300	yes	500	no		no	no	no	yes	2	2	1	1	1	1	1	1	1	2	1	2	2	no	yes	no	yes	no	no	no	no	no
300	13	25.02.2014	16.05.2014	F	180	2	yes	yes	yes	yes	20	no	yes	50	no	no		yes	300	yes	500	no		no	no	no	yes	2	2	1	1	1	1	1	1	1	2	1	2	2	no	yes	no	yes	no	no	no	no	no
301	13	25.02.2014	16.05.2014	F	180	2	yes	yes	yes	yes	20	no	yes	50	no	no		yes	300	yes	500	no		no	no	no	yes	2	2	1	1	1	1	1	1	1	2	1	2	2	no	yes	no	yes	no	no	no	no	no
302	13	25.02.2014	16.05.2014	F	180	2	yes	yes	yes	yes	20	no	yes	50	no	no		yes	300	yes	500	no		no	no	no	yes	2	2	1	1	1	1	1	1	1	2	1	2	2	no	yes	no	yes	no	no	no	no	no
303	13	25.02.2014	16.05.2014	F	180	2	yes	yes	yes	yes	20	no	yes	50	no	no		yes	300	yes	500	no		no	no	no	yes	2	2	1	1	1	1	1	1	1	2	1	2	2	no	yes	no	yes	no	no	no	no	no
304	13	25.02.2014	16.05.2014	F	180	2	yes	yes	yes	yes	20	no	yes	50	no	no		yes	300	yes	500	no		no	no	no	yes	2	2	1	1	1	1	1	1	1	2	1	2	2	no	yes	no	yes	no	no	no	no	no
305	13	25.02.2014	16.05.2014	F	180	2	yes	yes	yes	yes	20	no	yes	50	no	no		yes	300	yes	500	no		no	no	no	yes	2	2	1	1	1	1	1	1	1	2	1	2	2	no	yes	no	yes	no	no	no	no	no
306	13	25.02.2014	16.05.2014	F	180	2	yes	yes	yes	yes	20	no	yes	50	no	no		yes	300	yes	500	no		no	no	no	yes	2	2	1	1	1	1	1	1	1	2	1	2	2	no	yes	no	yes	no	no	no	no	no
307	13	25.02.2014	16.05.2014	F	180	2	yes	yes	yes	yes	20	no	yes	50	no	no		yes	300	yes	500	no		no	no	no	yes	2	2	1	1	1	1	1	1	1	2	1	2	2	no	yes	no	yes	no	no	no	no	no
308	13	25.02.2014	16.05.2014	F	180	2	yes	yes	yes	yes	20	no	yes	50	no	no		yes	300	yes	500	no		no	no	no	yes	2	2	1	1	1	1	1	1	1	2	1	2	2	no	yes	no	yes	no	no	no	no	no
309	13	25.02.2014	16.05.2014	F	180	2	yes	yes	yes	yes	20	no	yes	50	no	no		yes	300	yes	500	no		no	no	no	yes	2	2	1	1	1	1	1	1	1	2	1	2	2	no	yes	no	yes	no	no	no	no	no
310	13	25.02.2014	16.05.2014	F	180	2	yes	yes	yes	yes	20	no	yes	50	no	no		yes	300	yes	500	no		no	no	no	yes	2	2	1	1	1	1	1	1	1	2	1	2	2	no	yes	no	yes	no	no	no	no	no
311	13	25.02.2014	16.05.2014	F	180	2	yes	yes	yes	yes	20	no	yes	50	no	no		yes	300	yes	500	no		no	no	no	yes	2	2	1	1	1	1	1	1	1	2	1	2	2	no	yes	no	yes	no	no	no	no	no
312	13	25.02.2014	16.05.2014	F	180	2	yes	yes	yes	yes	20	no	yes	50	no	no		yes	300	yes	500	no		no	no	no	yes	2	2	1	1	1	1	1	1	1	2	1	2	2	no	yes	no	yes	no	no	no	no	no
313	13	25.02.2014	16.05.2014	F	180	2	yes	yes	yes	yes	20	no	yes	50	no	no		yes	300	yes	500	no		no	no	no	yes	2	2	1	1	1	1	1	1	1	2	1	2	2	no	yes	no	yes	no	no	no	no	no
314	13	25.02.2014	16.05.2014	F	180	2	yes	yes	yes	yes	20	no	yes	50	no	no		yes	300	yes	500	no		no	no	no	yes	2	2	1	1	1	1	1	1	1	2	1	2	2	no	yes	no	yes	no	no	no	no	no
315	13	25.02.2014	16.05.2014	F	180	2	yes	yes	yes	yes	20	no	yes	50	no	no		yes	300	yes	500	no		no	no	no	yes	2	2	1	1	1	1	1	1	1	2	1	2	2	no	yes	no	yes	no	no	no	no	no
316	13	25.02.2014	16.05.2014	F	180	2	yes	yes	yes	yes	20	no	yes	50	no	no		yes	300	yes	500	no		no	no	no	yes	2	2	1	1	1	1	1	1	1	2	1	2	2	no	yes	no	yes	no	no	no	no	no
317	14	18.03.2014	03.06.2014	FF	320	0	no	yes	yes	no		no	no		no	no			200	no		no		no	yes	yes	yes	2	1	1	2	1	1	2		2	1	1	2	2	no	yes	no	no	no	no	no	no	no
318	14	18.03.2014	03.06.2014	FF	320	0	no	yes	yes	no		no	no		no	no			200	no		no		no	yes	yes	yes	2	1	1	2	1	1	2		2	1	1	2	2	no	yes	no	no	no	no	no	no	no
319	14	18.03.2014	03.06.2014	FF	320	0	no	yes	yes	no		no	no		no	no			200	no		no		no	yes	yes	yes	2	1	1	2	1	1	2		2	1	1	2	2	no	yes	no	no	no	no	no	no	no
320	14	18.03.2014	03.06.2014	FF	320	0	no	yes	yes	no		no	no		no	no			200	no		no		no	yes	yes	yes	2	1	1	2	1	1	2		2	1	1	2	2	no	yes	no	no	no	no	no	no	no
321	14	18.03.2014	03.06.2014	FF	320	0	no	yes	yes	no		no	no		no	no			200	no		no		no	yes	yes	yes	2	1	1	2	1	1	2		2	1	1	2	2	no	yes	no	no	no	no	no	no	no
322	14	18.03.2014	03.06.2014	FF	320	0	no	yes	yes	no		no	no		no	no			200	no		no		no	yes	yes	yes	2	1	1	2	1	1	2		2	1	1	2	2	no	yes	no	no	no	no	no	no	no
323	14	18.03.2014	03.06.2014	FF	320	0	no	yes	yes	no		no	no		no	no			200	no		no		no	yes	yes	yes	2	1	1	2	1	1	2		2	1	1	2	2	no	yes	no	no	no	no	no	no	no
324	14	18.03.2014	03.06.2014	FF	320	0	no	yes	yes	no		no	no		no	no			200	no		no		no	yes	yes	yes	2	1	1	2	1	1	2		2	1	1	2	2	no	yes	no	no	no	no	no	no	no
325	14	18.03.2014	03.06.2014	FF	320	0	no	yes	yes	no		no	no		no	no			200	no		no		no	yes	yes	yes	2	1	1	2	1	1	2		2	1	1	2	2	no	yes	no	no	no	no	no	no	no
326	14	18.03.2014	03.06.2014	FF	320	0	no	yes	yes	no		no	no		no	no			200	no		no		no	yes	yes	yes	2	1	1	2	1	1	2		2	1	1	2	2	no	yes	no	no	no	no	no	no	no
327	14	18.03.2014	03.06.2014	FF	320	0	no	yes	yes	no		no	no		no	no			200	no		no		no	yes	yes	yes	2	1	1	2	1	1	2		2	1	1	2	2	no	yes	no	no	no	no	no	no	no
328	14	18.03.2014	03.06.2014	FF	320	0	no	yes	yes	no		no	no		no	no			200	no		no		no	yes	yes	yes	2	1	1	2	1	1	2		2	1	1	2	2	no	yes	no	no	no	no	no	no	no
329	14	18.03.2014	03.06.2014	FF	320	0	no	yes	yes	no		no	no		no	no			200	no		no		no	yes	yes	yes	2	1	1	2	1	1	2		2	1	1	2	2	no	yes	no	no	no	no	no	no	no
330	14	18.03.2014	03.06.2014	FF	320	0	no	yes	yes	no		no	no		no	no			200	no		no		no	yes	yes	yes	2	1	1	2	1	1	2		2	1	1	2	2	no	yes	no	no	no	no	no	no	no
331	14	18.03.2014	03.06.2014	FF	320	0	no	yes	yes	no		no	no		no	no			200	no		no		no	yes	yes	yes	2	1	1	2	1	1	2		2	1	1	2	2	no	yes	no	no	no	no	no	no	no
332	14	18.03.2014	03.06.2014	FF	320	0	no	yes	yes	no		no	no		no	no			200	no		no		no	yes	yes	yes	2	1	1	2	1	1	2		2	1	1	2	2	no	yes	no	no	no	no	no	no	no
333	14	18.03.2014	03.06.2014	FF	320	0	no	yes	yes	no		no	no		no	no			200	no		no		no	yes	yes	yes	2	1	1	2	1	1	2		2	1	1	2	2	no	yes	no	no	no	no	no	no	no
334	14	18.03.2014	03.06.2014	FF	320	0	no	yes	yes	no		no	no		no	no			200	no		no		no	yes	yes	yes	2	1	1	2	1	1	2		2	1	1	2	2	no	yes	no	no	no	no	no	no	no
335	14	18.03.2014	03.06.2014	FF	320	0	no	yes	yes	no		no	no		no	no			200	no		no		no	yes	yes	yes	2	1	1	2	1	1	2		2	1	1	2	2	no	yes	no	no	no	no	no	no	no
336	14	18.03.2014	03.06.2014	FF	320	0	no	yes	yes	no		no	no		no	no			200	no		no		no	yes	yes	yes	2	1	1	2	1	1	2		2	1	1	2	2	no	yes	no	no	no	no	no	no	no
337	15	20.03.2014	04.06.2014	F	200	2	no	yes	yes	no		no	yes	0	yes	no		yes	300	yes	500	no		yes	yes	no	yes	2	1	2	1	2	2	1	2	2	2	2	3	3	no	yes	no	no	no	no	no	no	no
338	15	20.03.2014	04.06.2014	F	200	2	no	yes	yes	no		no	yes	0	yes	no		yes	300	yes	500	no		yes	yes	no	yes	2	1	2	1	2	2	1	2	2	2	2	3	3	no	yes	no	no	no	no	no	no	no
339	15	20.03.2014	04.06.2014	F	200	2	no	yes	yes	no		no	yes	0	yes	no		yes	300	yes	500	no		yes	yes	no	yes	2	1	2	1	2	2	1	2	2	2	2	3	3	no	yes	no	no	no	no	no	no	no
340	15	20.03.2014	04.06.2014	F	200	2	no	yes	yes	no		no	yes	0	yes	no		yes	300	yes	500	no		yes	yes	no	yes	2	1	2	1	2	2	1	2	2	2	2	3	3	no	yes	no	no	no	no	no	no	no
341	hh	20.03.2014	04.06.2014	F	200	2	no	yes	yes	no		no	yes	0	yes	no		yes	300	yes	500	no		yes	yes	no	yes	2	1	2	1	2	2	1	2	2	2	2	3	3	no	yes	no	no	no	no	no	no	no
342	15	20.03.2014	04.06.2014	F	200	2	no	yes	yes	no		no	yes	0	yes	no		yes	300	yes	500	no		yes	yes	no	yes	2	1	2	1	2	2	1	2	2	2	2	3	3	no	yes	no	no	no	no	no	no	no
343	15	20.03.2014	04.06.2014	F	200	2	no	yes	yes	no		no	yes	0	yes	no		yes	300	yes	500	no		yes	yes	no	yes	2	1	2	1	2	2	1	2	2	2	2	3	3	no	yes	no	no	no	no	no	no	no
344	15	20.03.2014	04.06.2014	F	200	2	no	yes	yes	no		no	yes	0	yes	no		yes	300	yes	500	no		yes	yes	no	yes	2	1	2	1	2	2	1	2	2	2	2	3	3	no	yes	no	no	no	no	no	no	no
345	15	20.03.2014	04.06.2014	F	200	2	no	yes	yes	no		no	yes	0	yes	no		yes	300	yes	500	no		yes	yes	no	yes	2	1	2	1	2	2	1	2	2	2	2	3	3	no	yes	no	no	no	no	no	no	no
346	15	20.03.2014	04.06.2014	F	200	2	no	yes	yes	no		no	yes	0	yes	no		yes	300	yes	500	no		yes	yes	no	yes	2	1	2	1	2	2	1	2	2	2	2	3	3	no	yes	no	no	no	no	no	no	no
347	15	20.03.2014	04.06.2014	F	200	2	no	yes	yes	no		no	yes	0	yes	no		yes	300	yes	500	no		yes	yes	no	yes	2	1	2	1	2	2	1	2	2	2	2	3	3	no	yes	no	no	no	no	no	no	no
348	15	20.03.2014	04.06.2014	F	200	2	no	yes	yes	no		no	yes	0	yes	no		yes	300	yes	500	no		yes	yes	no	yes	2	1	2	1	2	2	1	2	2	2	2	3	3	no	yes	no	no	no	no	no	no	no
349	15	20.03.2014	04.06.2014	F	200	2	no	yes	yes	no		no	yes	0	yes	no		yes	300	yes	500	no		yes	yes	no	yes	2	1	2	1	2	2	1	2	2	2	2	3	3	no	yes	no	no	no	no	no	no	no
350	15	20.03.2014	04.06.2014	F	200	2	no	yes	yes	no		no	yes	0	yes	no		yes	300	yes	500	no		yes	yes	no	yes	2	1	2	1	2	2	1	2	2	2	2	3	3	no	yes	no	no	no	no	no	no	no
351	15	20.03.2014	04.06.2014	F	200	2	no	yes	yes	no		no	yes	0	yes	no		yes	300	yes	500	no		yes	yes	no	yes	2	1	2	1	2	2	1	2	2	2	2	3	3	no	yes	no	no	no	no	no	no	no
352	15	20.03.2014	04.06.2014	F	200	2	no	yes	yes	no		no	yes	0	yes	no		yes	300	yes	500	no		yes	yes	no	yes	2	1	2	1	2	2	1	2	2	2	2	3	3	no	yes	no	no	no	no	no	no	no
353	15	20.03.2014	04.06.2014	F	200	2	no	yes	yes	no		no	yes	0	yes	no		yes	300	yes	500	no		yes	yes	no	yes	2	1	2	1	2	2	1	2	2	2	2	3	3	no	yes	no	no	no	no	no	no	no
354	15	20.03.2014	04.06.2014	F	200	2	no	yes	yes	no		no	yes	0	yes	no		yes	300	yes	500	no		yes	yes	no	yes	2	1	2	1	2	2	1	2	2	2	2	3	3	no	yes	no	no	no	no	no	no	no
355	15	20.03.2014	04.06.2014	F	200	2	no	yes	yes	no		no	yes	0	yes	no		yes	300	yes	500	no		yes	yes	no	yes	2	1	2	1	2	2	1	2	2	2	2	3	3	no	yes	no	no	no	no	no	no	no
356	15	20.03.2014	04.06.2014	F	200	2	no	yes	yes	no		no	yes	0	yes	no		yes	300	yes	500	no		yes	yes	no	yes	2	1	2	1	2	2	1	2	2	2	2	3	3	no	yes	no	no	no	no	no	no	no
357	16	24.03.2014	25.06.2014	FF	160	1	no	yes	no	yes	0	yes	no		no	yes	1	yes	40	no		no		yes	yes	yes	yes	3	1	1	1	2	2	2		2	3	3		3	no	no	no	no	no	no	no	no	no
358	16	24.03.2014	25.06.2014	FF	160	1	no	yes	no	yes	0	yes	no		no	yes	1	yes	40	no		no		yes	yes	yes	yes	3	1	1	1	2	2	2		2	3	3		3	no	no	no	no	no	no	no	no	no
359	16	24.03.2014	25.06.2014	FF	160	1	no	yes	no	yes	0	yes	no		no	yes	1	yes	40	no		no		yes	yes	yes	yes	3	1	1	1	2	2	2		2	3	3		3	no	no	no	no	no	no	no	no	no
360	16	24.03.2014	25.06.2014	FF	160	1	no	yes	no	yes	0	yes	no		no	yes	1	yes	40	no		no		yes	yes	yes	yes	3	1	1	1	2	2	2		2	3	3		3	no	no	no	no	no	no	no	no	no
361	16	24.03.2014	25.06.2014	FF	160	1	no	yes	no	yes	0	yes	no		no	yes	1	yes	40	no		no		yes	yes	yes	yes	3	1	1	1	2	2	2		2	3	3		3	no	no	no	no	no	no	no	no	no
362	16	24.03.2014	25.06.2014	FF	160	1	no	yes	no	yes	0	yes	no		no	yes	1	yes	40	no		no		yes	yes	yes	yes	3	1	1	1	2	2	2		2	3	3		3	no	no	no	no	no	no	no	no	no
363	16	24.03.2014	25.06.2014	FF	160	1	no	yes	no	yes	0	yes	no		no	yes	1	yes	40	no		no		yes	yes	yes	yes	3	1	1	1	2	2	2		2	3	3		3	no	no	no	no	no	no	no	no	no
364	16	24.03.2014	25.06.2014	FF	160	1	no	yes	no	yes	0	yes	no		no	yes	1	yes	40	no		no		yes	yes	yes	yes	3	1	1	1	2	2	2		2	3	3		3	no	no	no	no	no	no	no	no	no
365	16	24.03.2014	25.06.2014	FF	160	1	no	yes	no	yes	0	yes	no		no	yes	1	yes	40	no		no		yes	yes	yes	yes	3	1	1	1	2	2	2		2	3	3		3	no	no	no	no	no	no	no	no	no
366	16	24.03.2014	25.06.2014	FF	160	1	no	yes	no	yes	0	yes	no		no	yes	1	yes	40	no		no		yes	yes	yes	yes	3	1	1	1	2	2	2		2	3	3		3	no	no	no	no	no	no	no	no	no
367	16	24.03.2014	25.06.2014	FF	160	1	no	yes	no	yes	0	yes	no		no	yes	1	yes	40	no		no		yes	yes	yes	yes	3	1	1	1	2	2	2		2	3	3		3	no	no	no	no	no	no	no	no	no
368	16	24.03.2014	25.06.2014	FF	160	1	no	yes	no	yes	0	yes	no		no	yes	1	yes	40	no		no		yes	yes	yes	yes	3	1	1	1	2	2	2		2	3	3		3	no	no	no	no	no	no	no	no	no
369	16	24.03.2014	25.06.2014	FF	160	1	no	yes	no	yes	0	yes	no		no	yes	1	yes	40	no		no		yes	yes	yes	yes	3	1	1	1	2	2	2		2	3	3		3	no	no	no	no	no	no	no	no	no
370	16	24.03.2014	25.06.2014	FF	160	1	no	yes	no	yes	0	yes	no		no	yes	1	yes	40	no		no		yes	yes	yes	yes	3	1	1	1	2	2	2		2	3	3		3	no	no	no	no	no	no	no	no	no
371	16	24.03.2014	25.06.2014	FF	160	1	no	yes	no	yes	0	yes	no		no	yes	1	yes	40	no		no		yes	yes	yes	yes	3	1	1	1	2	2	2		2	3	3		3	no	no	no	no	no	no	no	no	no
372	16	24.03.2014	25.06.2014	FF	160	1	no	yes	no	yes	0	yes	no		no	yes	1	yes	40	no		no		yes	yes	yes	yes	3	1	1	1	2	2	2		2	3	3		3	no	no	no	no	no	no	no	no	no
373	16	24.03.2014	25.06.2014	FF	160	1	no	yes	no	yes	0	yes	no		no	yes	1	yes	40	no		no		yes	yes	yes	yes	3	1	1	1	2	2	2		2	3	3		3	no	no	no	no	no	no	no	no	no
374	16	24.03.2014	25.06.2014	FF	160	1	no	yes	no	yes	0	yes	no		no	yes	1	yes	40	no		no		yes	yes	yes	yes	3	1	1	1	2	2	2		2	3	3		3	no	no	no	no	no	no	no	no	no
375	16	24.03.2014	25.06.2014	FF	160	1	no	yes	no	yes	0	yes	no		no	yes	1	yes	40	no		no		yes	yes	yes	yes	3	1	1	1	2	2	2		2	3	3		3	no	no	no	no	no	no	no	no	no
376	16	24.03.2014	25.06.2014	FF	160	1	no	yes	no	yes	0	yes	no		no	yes	1	yes	40	no		no		yes	yes	yes	yes	3	1	1	1	2	2	2		2	3	3		3	no	no	no	no	no	no	no	no	no
377	17	27.03.2014	16.06.2014	F	441	3	yes	yes	yes	no		no	no		no	no			400	no		no		no	yes	no	yes	2	1	1	1	1	1	1	1	1	1	1	1	1	yes	yes	no	no	yes	yes	no	no	no
378	17	27.03.2014	16.06.2014	F	441	3	yes	yes	yes	no		no	no		no	no			400	no		no		no	yes	no	yes	2	1	1	1	1	1	1	1	1	1	1	1	1	yes	yes	no	no	yes	yes	no	no	no
379	17	27.03.2014	16.06.2014	F	441	3	yes	yes	yes	no		no	no		no	no			400	no		no		no	yes	no	yes	2	1	1	1	1	1	1	1	1	1	1	1	1	yes	yes	no	no	yes	yes	no	no	no
380	17	27.03.2014	16.06.2014	F	441	3	yes	yes	yes	no		no	no		no	no			400	no		no		no	yes	no	yes	2	1	1	1	1	1	1	1	1	1	1	1	1	yes	yes	no	no	yes	yes	no	no	no
381	17	27.03.2014	16.06.2014	F	441	3	yes	yes	yes	no		no	no		no	no			400	no		no		no	yes	no	yes	2	1	1	1	1	1	1	1	1	1	1	1	1	yes	yes	no	no	yes	yes	no	no	no
382	17	27.03.2014	16.06.2014	F	441	3	yes	yes	yes	no		no	no		no	no			400	no		no		no	yes	no	yes	2	1	1	1	1	1	1	1	1	1	1	1	1	yes	yes	no	no	yes	yes	no	no	no
383	17	27.03.2014	16.06.2014	F	441	3	yes	yes	yes	no		no	no		no	no			400	no		no		no	yes	no	yes	2	1	1	1	1	1	1	1	1	1	1	1	1	yes	yes	no	no	yes	yes	no	no	no
384	17	27.03.2014	16.06.2014	F	441	3	yes	yes	yes	no		no	no		no	no			400	no		no		no	yes	no	yes	2	1	1	1	1	1	1	1	1	1	1	1	1	yes	yes	no	no	yes	yes	no	no	no
385	17	27.03.2014	16.06.2014	F	441	3	yes	yes	yes	no		no	no		no	no			400	no		no		no	yes	no	yes	2	1	1	1	1	1	1	1	1	1	1	1	1	yes	yes	no	no	yes	yes	no	no	no
386	17	27.03.2014	16.06.2014	F	441	3	yes	yes	yes	no		no	no		no	no			400	no		no		no	yes	no	yes	2	1	1	1	1	1	1	1	1	1	1	1	1	yes	yes	no	no	yes	yes	no	no	no
387	17	27.03.2014	16.06.2014	F	441	3	yes	yes	yes	no		no	no		no	no			400	no		no		no	yes	no	yes	2	1	1	1	1	1	1	1	1	1	1	1	1	yes	yes	no	no	yes	yes	no	no	no
388	17	27.03.2014	16.06.2014	F	441	3	yes	yes	yes	no		no	no		no	no			400	no		no		no	yes	no	yes	2	1	1	1	1	1	1	1	1	1	1	1	1	yes	yes	no	no	yes	yes	no	no	no
389	17	27.03.2014	16.06.2014	F	441	3	yes	yes	yes	no		no	no		no	no			400	no		no		no	yes	no	yes	2	1	1	1	1	1	1	1	1	1	1	1	1	yes	yes	no	no	yes	yes	no	no	no
390	17	27.03.2014	16.06.2014	F	441	3	yes	yes	yes	no		no	no		no	no			400	no		no		no	yes	no	yes	2	1	1	1	1	1	1	1	1	1	1	1	1	yes	yes	no	no	yes	yes	no	no	no
391	17	27.03.2014	16.06.2014	F	441	3	yes	yes	yes	no		no	no		no	no			400	no		no		no	yes	no	yes	2	1	1	1	1	1	1	1	1	1	1	1	1	yes	yes	no	no	yes	yes	no	no	no
392	17	27.03.2014	16.06.2014	F	441	3	yes	yes	yes	no		no	no		no	no			400	no		no		no	yes	no	yes	2	1	1	1	1	1	1	1	1	1	1	1	1	yes	yes	no	no	yes	yes	no	no	no
393	17	27.03.2014	16.06.2014	F	441	3	yes	yes	yes	no		no	no		no	no			400	no		no		no	yes	no	yes	2	1	1	1	1	1	1	1	1	1	1	1	1	yes	yes	no	no	yes	yes	no	no	no
394	17	27.03.2014	16.06.2014	F	441	3	yes	yes	yes	no		no	no		no	no			400	no		no		no	yes	no	yes	2	1	1	1	1	1	1	1	1	1	1	1	1	yes	yes	no	no	yes	yes	no	no	no
395	17	27.03.2014	16.06.2014	F	441	3	yes	yes	yes	no		no	no		no	no			400	no		no		no	yes	no	yes	2	1	1	1	1	1	1	1	1	1	1	1	1	yes	yes	no	no	yes	yes	no	no	no
396	17	27.03.2014	16.06.2014	F	441	3	yes	yes	yes	no		no	no		no	no			400	no		no		no	yes	no	yes	2	1	1	1	1	1	1	1	1	1	1	1	1	yes	yes	no	no	yes	yes	no	no	no
397	18	08.04.2014	19.06.2014	FF	250	0	no	no	no	no		no	no		no	no			500	no		no		no	no	no	no	2	1	1	1	3	1	2		2	3	3		3	no	no	no	no	no	no	no	no	no
398	18	08.04.2014	19.06.2014	FF	250	0	no	no	no	no		no	no		no	no			500	no		no		no	no	no	no	2	1	1	1	3	1	2		2	3	3		3	no	no	no	no	no	no	no	no	no
399	18	08.04.2014	19.06.2014	FF	250	0	no	no	no	no		no	no		no	no			500	no		no		no	no	no	no	2	1	1	1	3	1	2		2	3	3		3	no	no	no	no	no	no	no	no	no
400	18	08.04.2014	19.06.2014	FF	250	0	no	no	no	no		no	no		no	no			500	no		no		no	no	no	no	2	1	1	1	3	1	2		2	3	3		3	no	no	no	no	no	no	no	no	no
401	18	08.04.2014	19.06.2014	FF	250	0	no	no	no	no		no	no		no	no			500	no		no		no	no	no	no	2	1	1	1	3	1	2		2	3	3		3	no	no	no	no	no	no	no	no	no
402	18	08.04.2014	19.06.2014	FF	250	0	no	no	no	no		no	no		no	no			500	no		no		no	no	no	no	2	1	1	1	3	1	2		2	3	3		3	no	no	no	no	no	no	no	no	no
403	18	08.04.2014	19.06.2014	FF	250	0	no	no	no	no		no	no		no	no			500	no		no		no	no	no	no	2	1	1	1	3	1	2		2	3	3		3	no	no	no	no	no	no	no	no	no
404	18	08.04.2014	19.06.2014	FF	250	0	no	no	no	no		no	no		no	no			500	no		no		no	no	no	no	2	1	1	1	3	1	2		2	3	3		3	no	no	no	no	no	no	no	no	no
405	18	08.04.2014	19.06.2014	FF	250	0	no	no	no	no		no	no		no	no			500	no		no		no	no	no	no	2	1	1	1	3	1	2		2	3	3		3	no	no	no	no	no	no	no	no	no
406	18	08.04.2014	19.06.2014	FF	250	0	no	no	no	no		no	no		no	no			500	no		no		no	no	no	no	2	1	1	1	3	1	2		2	3	3		3	no	no	no	no	no	no	no	no	no
407	18	08.04.2014	19.06.2014	FF	250	0	no	no	no	no		no	no		no	no			500	no		no		no	no	no	no	2	1	1	1	3	1	2		2	3	3		3	no	no	no	no	no	no	no	no	no
408	18	08.04.2014	19.06.2014	FF	250	0	no	no	no	no		no	no		no	no			500	no		no		no	no	no	no	2	1	1	1	3	1	2		2	3	3		3	no	no	no	no	no	no	no	no	no
409	18	08.04.2014	19.06.2014	FF	250	0	no	no	no	no		no	no		no	no			500	no		no		no	no	no	no	2	1	1	1	3	1	2		2	3	3		3	no	no	no	no	no	no	no	no	no
410	18	08.04.2014	19.06.2014	FF	250	0	no	no	no	no		no	no		no	no			500	no		no		no	no	no	no	2	1	1	1	3	1	2		2	3	3		3	no	no	no	no	no	no	no	no	no
411	18	08.04.2014	19.06.2014	FF	250	0	no	no	no	no		no	no		no	no			500	no		no		no	no	no	no	2	1	1	1	3	1	2		2	3	3		3	no	no	no	no	no	no	no	no	no
412	18	08.04.2014	19.06.2014	FF	250	0	no	no	no	no		no	no		no	no			500	no		no		no	no	no	no	2	1	1	1	3	1	2		2	3	3		3	no	no	no	no	no	no	no	no	no
413	18	08.04.2014	19.06.2014	FF	250	0	no	no	no	no		no	no		no	no			500	no		no		no	no	no	no	2	1	1	1	3	1	2		2	3	3		3	no	no	no	no	no	no	no	no	no
414	18	08.04.2014	19.06.2014	FF	250	0	no	no	no	no		no	no		no	no			500	no		no		no	no	no	no	2	1	1	1	3	1	2		2	3	3		3	no	no	no	no	no	no	no	no	no
415	18	08.04.2014	19.06.2014	FF	250	0	no	no	no	no		no	no		no	no			500	no		no		no	no	no	no	2	1	1	1	3	1	2		2	3	3		3	no	no	no	no	no	no	no	no	no
416	18	08.04.2014	19.06.2014	FF	250	0	no	no	no	no		no	no		no	no			500	no		no		no	no	no	no	2	1	1	1	3	1	2		2	3	3		3	no	no	no	no	no	no	no	no	no
417	19	10.04.2014	07.07.2014	F	800	2	no	yes	yes	yes	20	no	no		no	no		yes	300	no		no		yes	yes	no	yes	3	1	2	1	2	2	1	1	2	2	2	2	2	yes	yes	no	yes	no	no	no	no	no
418	19	10.04.2014	07.07.2014	F	800	2	no	yes	yes	yes	20	no	no		no	no		yes	300	no		no		yes	yes	no	yes	3	1	2	1	2	2	1	1	2	2	2	2	2	yes	yes	no	yes	no	no	no	no	no
419	19	10.04.2014	07.07.2014	F	800	2	no	yes	yes	yes	20	no	no		no	no		yes	300	no		no		yes	yes	no	yes	3	1	2	1	2	2	1	1	2	2	2	2	2	yes	yes	no	yes	no	no	no	no	no
420	19	10.04.2014	07.07.2014	F	800	2	no	yes	yes	yes	20	no	no		no	no		yes	300	no		no		yes	yes	no	yes	3	1	2	1	2	2	1	1	2	2	2	2	2	yes	yes	no	yes	no	no	no	no	no
421	19	10.04.2014	07.07.2014	F	800	2	no	yes	yes	yes	20	no	no		no	no		yes	300	no		no		yes	yes	no	yes	3	1	2	1	2	2	1	1	2	2	2	2	2	yes	yes	no	yes	no	no	no	no	no
422	19	10.04.2014	07.07.2014	F	800	2	no	yes	yes	yes	20	no	no		no	no		yes	300	no		no		yes	yes	no	yes	3	1	2	1	2	2	1	1	2	2	2	2	2	yes	yes	no	yes	no	no	no	no	no
423	19	10.04.2014	07.07.2014	F	800	2	no	yes	yes	yes	20	no	no		no	no		yes	300	no		no		yes	yes	no	yes	3	1	2	1	2	2	1	1	2	2	2	2	2	yes	yes	no	yes	no	no	no	no	no
424	19	10.04.2014	07.07.2014	F	800	2	no	yes	yes	yes	20	no	no		no	no		yes	300	no		no		yes	yes	no	yes	3	1	2	1	2	2	1	1	2	2	2	2	2	yes	yes	no	yes	no	no	no	no	no
425	19	10.04.2014	07.07.2014	F	800	2	no	yes	yes	yes	20	no	no		no	no		yes	300	no		no		yes	yes	no	yes	3	1	2	1	2	2	1	1	2	2	2	2	2	yes	yes	no	yes	no	no	no	no	no
426	19	10.04.2014	07.07.2014	F	800	2	no	yes	yes	yes	20	no	no		no	no		yes	300	no		no		yes	yes	no	yes	3	1	2	1	2	2	1	1	2	2	2	2	2	yes	yes	no	yes	no	no	no	no	no
427	19	10.04.2014	07.07.2014	F	800	2	no	yes	yes	yes	20	no	no		no	no		yes	300	no		no		yes	yes	no	yes	3	1	2	1	2	2	1	1	2	2	2	2	2	yes	yes	no	yes	no	no	no	no	no
428	19	10.04.2014	07.07.2014	F	800	2	no	yes	yes	yes	20	no	no		no	no		yes	300	no		no		yes	yes	no	yes	3	1	2	1	2	2	1	1	2	2	2	2	2	yes	yes	no	yes	no	no	no	no	no
429	19	10.04.2014	07.07.2014	F	800	2	no	yes	yes	yes	20	no	no		no	no		yes	300	no		no		yes	yes	no	yes	3	1	2	1	2	2	1	1	2	2	2	2	2	yes	yes	no	yes	no	no	no	no	no
430	19	10.04.2014	07.07.2014	F	800	2	no	yes	yes	yes	20	no	no		no	no		yes	300	no		no		yes	yes	no	yes	3	1	2	1	2	2	1	1	2	2	2	2	2	yes	yes	no	yes	no	no	no	no	no
431	19	10.04.2014	07.07.2014	F	800	2	no	yes	yes	yes	20	no	no		no	no		yes	300	no		no		yes	yes	no	yes	3	1	2	1	2	2	1	1	2	2	2	2	2	yes	yes	no	yes	no	no	no	no	no
432	19	10.04.2014	07.07.2014	F	800	2	no	yes	yes	yes	20	no	no		no	no		yes	300	no		no		yes	yes	no	yes	3	1	2	1	2	2	1	1	2	2	2	2	2	yes	yes	no	yes	no	no	no	no	no
433	19	10.04.2014	07.07.2014	F	800	2	no	yes	yes	yes	20	no	no		no	no		yes	300	no		no		yes	yes	no	yes	3	1	2	1	2	2	1	1	2	2	2	2	2	yes	yes	no	yes	no	no	no	no	no
434	19	10.04.2014	07.07.2014	F	800	2	no	yes	yes	yes	20	no	no		no	no		yes	300	no		no		yes	yes	no	yes	3	1	2	1	2	2	1	1	2	2	2	2	2	yes	yes	no	yes	no	no	no	no	no
435	19	10.04.2014	07.07.2014	F	800	2	no	yes	yes	yes	20	no	no		no	no		yes	300	no		no		yes	yes	no	yes	3	1	2	1	2	2	1	1	2	2	2	2	2	yes	yes	no	yes	no	no	no	no	no
436	19	10.04.2014	07.07.2014	F	800	2	no	yes	yes	yes	20	no	no		no	no		yes	300	no		no		yes	yes	no	yes	3	1	2	1	2	2	1	1	2	2	2	2	2	yes	yes	no	yes	no	no	no	no	no
437	20	17.04.2014	15.07.2014	F	260	1	no	yes	yes	yes	0	yes	no		no	no		yes	500	yes	100	no		no	yes	yes	yes	3	1	1	1	3	1	1	2	2	2	1	2	2	no	no	no	yes	no	no	no	no	no
438	20	17.04.2014	15.07.2014	F	260	1	no	yes	yes	yes	0	yes	no		no	no		yes	500	yes	100	no		no	yes	yes	yes	3	1	1	1	3	1	1	2	2	2	1	2	2	no	no	no	yes	no	no	no	no	no
439	20	17.04.2014	15.07.2014	F	260	1	no	yes	yes	yes	0	yes	no		no	no		yes	500	yes	100	no		no	yes	yes	yes	3	1	1	1	3	1	1	2	2	2	1	2	2	no	no	no	yes	no	no	no	no	no
440	20	17.04.2014	15.07.2014	F	260	1	no	yes	yes	yes	0	yes	no		no	no		yes	500	yes	100	no		no	yes	yes	yes	3	1	1	1	3	1	1	2	2	2	1	2	2	no	no	no	yes	no	no	no	no	no
441	20	17.04.2014	15.07.2014	F	260	1	no	yes	yes	yes	0	yes	no		no	no		yes	500	yes	100	no		no	yes	yes	yes	3	1	1	1	3	1	1	2	2	2	1	2	2	no	no	no	yes	no	no	no	no	no
442	20	17.04.2014	15.07.2014	F	260	1	no	yes	yes	yes	0	yes	no		no	no		yes	500	yes	100	no		no	yes	yes	yes	3	1	1	1	3	1	1	2	2	2	1	2	2	no	no	no	yes	no	no	no	no	no
443	20	17.04.2014	15.07.2014	F	260	1	no	yes	yes	yes	0	yes	no		no	no		yes	500	yes	100	no		no	yes	yes	yes	3	1	1	1	3	1	1	2	2	2	1	2	2	no	no	no	yes	no	no	no	no	no
444	20	17.04.2014	15.07.2014	F	260	1	no	yes	yes	yes	0	yes	no		no	no		yes	500	yes	100	no		no	yes	yes	yes	3	1	1	1	3	1	1	2	2	2	1	2	2	no	no	no	yes	no	no	no	no	no
445	20	17.04.2014	15.07.2014	F	260	1	no	yes	yes	yes	0	yes	no		no	no		yes	500	yes	100	no		no	yes	yes	yes	3	1	1	1	3	1	1	2	2	2	1	2	2	no	no	no	yes	no	no	no	no	no
446	20	17.04.2014	15.07.2014	F	260	1	no	yes	yes	yes	0	yes	no		no	no		yes	500	yes	100	no		no	yes	yes	yes	3	1	1	1	3	1	1	2	2	2	1	2	2	no	no	no	yes	no	no	no	no	no
447	20	17.04.2014	15.07.2014	F	260	1	no	yes	yes	yes	0	yes	no		no	no		yes	500	yes	100	no		no	yes	yes	yes	3	1	1	1	3	1	1	2	2	2	1	2	2	no	no	no	yes	no	no	no	no	no
448	20	17.04.2014	15.07.2014	F	260	1	no	yes	yes	yes	0	yes	no		no	no		yes	500	yes	100	no		no	yes	yes	yes	3	1	1	1	3	1	1	2	2	2	1	2	2	no	no	no	yes	no	no	no	no	no
449	20	17.04.2014	15.07.2014	F	260	1	no	yes	yes	yes	0	yes	no		no	no		yes	500	yes	100	no		no	yes	yes	yes	3	1	1	1	3	1	1	2	2	2	1	2	2	no	no	no	yes	no	no	no	no	no
450	20	17.04.2014	15.07.2014	F	260	1	no	yes	yes	yes	0	yes	no		no	no		yes	500	yes	100	no		no	yes	yes	yes	3	1	1	1	3	1	1	2	2	2	1	2	2	no	no	no	yes	no	no	no	no	no
451	20	17.04.2014	15.07.2014	F	260	1	no	yes	yes	yes	0	yes	no		no	no		yes	500	yes	100	no		no	yes	yes	yes	3	1	1	1	3	1	1	2	2	2	1	2	2	no	no	no	yes	no	no	no	no	no
452	20	17.04.2014	15.07.2014	F	260	1	no	yes	yes	yes	0	yes	no		no	no		yes	500	yes	100	no		no	yes	yes	yes	3	1	1	1	3	1	1	2	2	2	1	2	2	no	no	no	yes	no	no	no	no	no
453	20	17.04.2014	15.07.2014	F	260	1	no	yes	yes	yes	0	yes	no		no	no		yes	500	yes	100	no		no	yes	yes	yes	3	1	1	1	3	1	1	2	2	2	1	2	2	no	no	no	yes	no	no	no	no	no
454	20	17.04.2014	15.07.2014	F	260	1	no	yes	yes	yes	0	yes	no		no	no		yes	500	yes	100	no		no	yes	yes	yes	3	1	1	1	3	1	1	2	2	2	1	2	2	no	no	no	yes	no	no	no	no	no
455	20	17.04.2014	15.07.2014	F	260	1	no	yes	yes	yes	0	yes	no		no	no		yes	500	yes	100	no		no	yes	yes	yes	3	1	1	1	3	1	1	2	2	2	1	2	2	no	no	no	yes	no	no	no	no	no
456	20	17.04.2014	15.07.2014	F	260	1	no	yes	yes	yes	0	yes	no		no	no		yes	500	yes	100	no		no	yes	yes	yes	3	1	1	1	3	1	1	2	2	2	1	2	2	no	no	no	yes	no	no	no	no	no
457	21	05.05.2014	06.08.2014	F	341	2	no	no	no	no		no	no		no	no			10	yes	700	yes	100	no	yes	no	yes	3	2	1	1	1	1	2		2	2	2		2	no	yes	no	no	no	no	no	no	no
458	21	05.05.2014	06.08.2014	F	341	2	no	no	no	no		no	no		no	no			10	yes	700	yes	100	no	yes	no	yes	3	2	1	1	1	1	2		2	2	2		2	no	yes	no	no	no	no	no	no	no
459	21	05.05.2014	06.08.2014	F	341	2	no	no	no	no		no	no		no	no			10	yes	700	yes	100	no	yes	no	yes	3	2	1	1	1	1	2		2	2	2		2	no	yes	no	no	no	no	no	no	no
460	21	05.05.2014	06.08.2014	F	341	2	no	no	no	no		no	no		no	no			10	yes	700	yes	100	no	yes	no	yes	3	2	1	1	1	1	2		2	2	2		2	no	yes	no	no	no	no	no	no	no
461	21	05.05.2014	06.08.2014	F	341	2	no	no	no	no		no	no		no	no			10	yes	700	yes	100	no	yes	no	yes	3	2	1	1	1	1	2		2	2	2		2	no	yes	no	no	no	no	no	no	no
462	21	05.05.2014	06.08.2014	F	341	2	no	no	no	no		no	no		no	no			10	yes	700	yes	100	no	yes	no	yes	3	2	1	1	1	1	2		2	2	2		2	no	yes	no	no	no	no	no	no	no
463	21	05.05.2014	06.08.2014	F	341	2	no	no	no	no		no	no		no	no			10	yes	700	yes	100	no	yes	no	yes	3	2	1	1	1	1	2		2	2	2		2	no	yes	no	no	no	no	no	no	no
464	21	05.05.2014	06.08.2014	F	341	2	no	no	no	no		no	no		no	no			10	yes	700	yes	100	no	yes	no	yes	3	2	1	1	1	1	2		2	2	2		2	no	yes	no	no	no	no	no	no	no
465	21	05.05.2014	06.08.2014	F	341	2	no	no	no	no		no	no		no	no			10	yes	700	yes	100	no	yes	no	yes	3	2	1	1	1	1	2		2	2	2		2	no	yes	no	no	no	no	no	no	no
466	21	05.05.2014	06.08.2014	F	341	2	no	no	no	no		no	no		no	no			10	yes	700	yes	100	no	yes	no	yes	3	2	1	1	1	1	2		2	2	2		2	no	yes	no	no	no	no	no	no	no
467	21	05.05.2014	06.08.2014	F	341	2	no	no	no	no		no	no		no	no			10	yes	700	yes	100	no	yes	no	yes	3	2	1	1	1	1	2		2	2	2		2	no	yes	no	no	no	no	no	no	no
468	21	05.05.2014	06.08.2014	F	341	2	no	no	no	no		no	no		no	no			10	yes	700	yes	100	no	yes	no	yes	3	2	1	1	1	1	2		2	2	2		2	no	yes	no	no	no	no	no	no	no
469	21	05.05.2014	06.08.2014	F	341	2	no	no	no	no		no	no		no	no			10	yes	700	yes	100	no	yes	no	yes	3	2	1	1	1	1	2		2	2	2		2	no	yes	no	no	no	no	no	no	no
470	21	05.05.2014	06.08.2014	F	341	2	no	no	no	no		no	no		no	no			10	yes	700	yes	100	no	yes	no	yes	3	2	1	1	1	1	2		2	2	2		2	no	yes	no	no	no	no	no	no	no
471	21	05.05.2014	06.08.2014	F	341	2	no	no	no	no		no	no		no	no			10	yes	700	yes	100	no	yes	no	yes	3	2	1	1	1	1	2		2	2	2		2	no	yes	no	no	no	no	no	no	no
472	21	05.05.2014	06.08.2014	F	341	2	no	no	no	no		no	no		no	no			10	yes	700	yes	100	no	yes	no	yes	3	2	1	1	1	1	2		2	2	2		2	no	yes	no	no	no	no	no	no	no
473	21	05.05.2014	06.08.2014	F	341	2	no	no	no	no		no	no		no	no			10	yes	700	yes	100	no	yes	no	yes	3	2	1	1	1	1	2		2	2	2		2	no	yes	no	no	no	no	no	no	no
474	21	05.05.2014	06.08.2014	F	341	2	no	no	no	no		no	no		no	no			10	yes	700	yes	100	no	yes	no	yes	3	2	1	1	1	1	2		2	2	2		2	no	yes	no	no	no	no	no	no	no
475	21	05.05.2014	06.08.2014	F	341	2	no	no	no	no		no	no		no	no			10	yes	700	yes	100	no	yes	no	yes	3	2	1	1	1	1	2		2	2	2		2	no	yes	no	no	no	no	no	no	no
476	21	05.05.2014	06.08.2014	F	341	2	no	no	no	no		no	no		no	no			10	yes	700	yes	100	no	yes	no	yes	3	2	1	1	1	1	2		2	2	2		2	no	yes	no	no	no	no	no	no	no
477	22	26.05.2014	27.08.2014	F	210	2	no	yes	yes	yes	50	no	no		no	no		yes	150	yes	100	no		no	no	yes	yes	3	2	1	1	2	1	1	1	1			2	2	no	no	no	no	yes	yes	yes	yes	no
478	22	26.05.2014	27.08.2014	F	210	2	no	yes	yes	yes	50	no	no		no	no		yes	150	yes	100	no		no	no	yes	yes	3	2	1	1	2	1	1	1	1			2	2	no	no	no	no	yes	yes	yes	yes	no
479	22	26.05.2014	27.08.2014	F	210	2	no	yes	yes	yes	50	no	no		no	no		yes	150	yes	100	no		no	no	yes	yes	3	2	1	1	2	1	1	1	1			2	2	no	no	no	no	yes	yes	yes	yes	no
480	22	26.05.2014	27.08.2014	F	210	2	no	yes	yes	yes	50	no	no		no	no		yes	150	yes	100	no		no	no	yes	yes	3	2	1	1	2	1	1	1	1			2	2	no	no	no	no	yes	yes	yes	yes	no
481	22	26.05.2014	27.08.2014	F	210	2	no	yes	yes	yes	50	no	no		no	no		yes	150	yes	100	no		no	no	yes	yes	3	2	1	1	2	1	1	1	1			2	2	no	no	no	no	yes	yes	yes	yes	no
482	22	26.05.2014	27.08.2014	F	210	2	no	yes	yes	yes	50	no	no		no	no		yes	150	yes	100	no		no	no	yes	yes	3	2	1	1	2	1	1	1	1			2	2	no	no	no	no	yes	yes	yes	yes	no
483	22	26.05.2014	27.08.2014	F	210	2	no	yes	yes	yes	50	no	no		no	no		yes	150	yes	100	no		no	no	yes	yes	3	2	1	1	2	1	1	1	1			2	2	no	no	no	no	yes	yes	yes	yes	no
484	22	26.05.2014	27.08.2014	F	210	2	no	yes	yes	yes	50	no	no		no	no		yes	150	yes	100	no		no	no	yes	yes	3	2	1	1	2	1	1	1	1			2	2	no	no	no	no	yes	yes	yes	yes	no
485	22	26.05.2014	27.08.2014	F	210	2	no	yes	yes	yes	50	no	no		no	no		yes	150	yes	100	no		no	no	yes	yes	3	2	1	1	2	1	1	1	1			2	2	no	no	no	no	yes	yes	yes	yes	no
486	22	26.05.2014	27.08.2014	F	210	2	no	yes	yes	yes	50	no	no		no	no		yes	150	yes	100	no		no	no	yes	yes	3	2	1	1	2	1	1	1	1			2	2	no	no	no	no	yes	yes	yes	yes	no
487	22	26.05.2014	27.08.2014	F	210	2	no	yes	yes	yes	50	no	no		no	no		yes	150	yes	100	no		no	no	yes	yes	3	2	1	1	2	1	1	1	1			2	2	no	no	no	no	yes	yes	yes	yes	no
488	22	26.05.2014	27.08.2014	F	210	2	no	yes	yes	yes	50	no	no		no	no		yes	150	yes	100	no		no	no	yes	yes	3	2	1	1	2	1	1	1	1			2	2	no	no	no	no	yes	yes	yes	yes	no
489	22	26.05.2014	27.08.2014	F	210	2	no	yes	yes	yes	50	no	no		no	no		yes	150	yes	100	no		no	no	yes	yes	3	2	1	1	2	1	1	1	1			2	2	no	no	no	no	yes	yes	yes	yes	no
490	22	26.05.2014	27.08.2014	F	210	2	no	yes	yes	yes	50	no	no		no	no		yes	150	yes	100	no		no	no	yes	yes	3	2	1	1	2	1	1	1	1			2	2	no	no	no	no	yes	yes	yes	yes	no
491	22	26.05.2014	27.08.2014	F	210	2	no	yes	yes	yes	50	no	no		no	no		yes	150	yes	100	no		no	no	yes	yes	3	2	1	1	2	1	1	1	1			2	2	no	no	no	no	yes	yes	yes	yes	no
492	22	26.05.2014	27.08.2014	F	210	2	no	yes	yes	yes	50	no	no		no	no		yes	150	yes	100	no		no	no	yes	yes	3	2	1	1	2	1	1	1	1			2	2	no	no	no	no	yes	yes	yes	yes	no
493	22	26.05.2014	27.08.2014	F	210	2	no	yes	yes	yes	50	no	no		no	no		yes	150	yes	100	no		no	no	yes	yes	3	2	1	1	2	1	1	1	1			2	2	no	no	no	no	yes	yes	yes	yes	no
494	22	26.05.2014	27.08.2014	F	210	2	no	yes	yes	yes	50	no	no		no	no		yes	150	yes	100	no		no	no	yes	yes	3	2	1	1	2	1	1	1	1			2	2	no	no	no	no	yes	yes	yes	yes	no
495	22	26.05.2014	27.08.2014	F	210	2	no	yes	yes	yes	50	no	no		no	no		yes	150	yes	100	no		no	no	yes	yes	3	2	1	1	2	1	1	1	1			2	2	no	no	no	no	yes	yes	yes	yes	no
496	22	26.05.2014	27.08.2014	F	210	2	no	yes	yes	yes	50	no	no		no	no		yes	150	yes	100	no		no	no	yes	yes	3	2	1	1	2	1	1	1	1			2	2	no	no	no	no	yes	yes	yes	yes	no
497	23	10.06.2014	02.09.2014	F	239	3	yes	yes	yes	yes	3	no	no		no	no		yes	300	yes	0	no		no	yes	no	yes	3	1	2	1	2	1	1	1	1	2	2	2	2	no	yes	no	yes	yes	no	no	no	no
498	23	10.06.2014	02.09.2014	F	239	3	yes	yes	yes	yes	3	no	no		no	no		yes	300	yes	0	no		no	yes	no	yes	3	1	2	1	2	1	1	1	1	2	2	2	2	no	yes	no	yes	yes	no	no	no	no
499	23	10.06.2014	02.09.2014	F	239	3	yes	yes	yes	yes	3	no	no		no	no		yes	300	yes	0	no		no	yes	no	yes	3	1	2	1	2	1	1	1	1	2	2	2	2	no	yes	no	yes	yes	no	no	no	no
500	23	10.06.2014	02.09.2014	F	239	3	yes	yes	yes	yes	3	no	no		no	no		yes	300	yes	0	no		no	yes	no	yes	3	1	2	1	2	1	1	1	1	2	2	2	2	no	yes	no	yes	yes	no	no	no	no
501	23	10.06.2014	02.09.2014	F	239	3	yes	yes	yes	yes	3	no	no		no	no		yes	300	yes	0	no		no	yes	no	yes	3	1	2	1	2	1	1	1	1	2	2	2	2	no	yes	no	yes	yes	no	no	no	no
502	23	10.06.2014	02.09.2014	F	239	3	yes	yes	yes	yes	3	no	no		no	no		yes	300	yes	0	no		no	yes	no	yes	3	1	2	1	2	1	1	1	1	2	2	2	2	no	yes	no	yes	yes	no	no	no	no
503	23	10.06.2014	02.09.2014	F	239	3	yes	yes	yes	yes	3	no	no		no	no		yes	300	yes	0	no		no	yes	no	yes	3	1	2	1	2	1	1	1	1	2	2	2	2	no	yes	no	yes	yes	no	no	no	no
504	23	10.06.2014	02.09.2014	F	239	3	yes	yes	yes	yes	3	no	no		no	no		yes	300	yes	0	no		no	yes	no	yes	3	1	2	1	2	1	1	1	1	2	2	2	2	no	yes	no	yes	yes	no	no	no	no
505	23	10.06.2014	02.09.2014	F	239	3	yes	yes	yes	yes	3	no	no		no	no		yes	300	yes	0	no		no	yes	no	yes	3	1	2	1	2	1	1	1	1	2	2	2	2	no	yes	no	yes	yes	no	no	no	no
506	23	10.06.2014	02.09.2014	F	239	3	yes	yes	yes	yes	3	no	no		no	no		yes	300	yes	0	no		no	yes	no	yes	3	1	2	1	2	1	1	1	1	2	2	2	2	no	yes	no	yes	yes	no	no	no	no
507	23	10.06.2014	02.09.2014	F	239	3	yes	yes	yes	yes	3	no	no		no	no		yes	300	yes	0	no		no	yes	no	yes	3	1	2	1	2	1	1	1	1	2	2	2	2	no	yes	no	yes	yes	no	no	no	no
508	23	10.06.2014	02.09.2014	F	239	3	yes	yes	yes	yes	3	no	no		no	no		yes	300	yes	0	no		no	yes	no	yes	3	1	2	1	2	1	1	1	1	2	2	2	2	no	yes	no	yes	yes	no	no	no	no
509	23	10.06.2014	02.09.2014	F	239	3	yes	yes	yes	yes	3	no	no		no	no		yes	300	yes	0	no		no	yes	no	yes	3	1	2	1	2	1	1	1	1	2	2	2	2	no	yes	no	yes	yes	no	no	no	no
510	23	10.06.2014	02.09.2014	F	239	3	yes	yes	yes	yes	3	no	no		no	no		yes	300	yes	0	no		no	yes	no	yes	3	1	2	1	2	1	1	1	1	2	2	2	2	no	yes	no	yes	yes	no	no	no	no
511	23	10.06.2014	02.09.2014	F	239	3	yes	yes	yes	yes	3	no	no		no	no		yes	300	yes	0	no		no	yes	no	yes	3	1	2	1	2	1	1	1	1	2	2	2	2	no	yes	no	yes	yes	no	no	no	no
512	23	10.06.2014	02.09.2014	F	239	3	yes	yes	yes	yes	3	no	no		no	no		yes	300	yes	0	no		no	yes	no	yes	3	1	2	1	2	1	1	1	1	2	2	2	2	no	yes	no	yes	yes	no	no	no	no
513	23	10.06.2014	02.09.2014	F	239	3	yes	yes	yes	yes	3	no	no		no	no		yes	300	yes	0	no		no	yes	no	yes	3	1	2	1	2	1	1	1	1	2	2	2	2	no	yes	no	yes	yes	no	no	no	no
514	23	10.06.2014	02.09.2014	F	239	3	yes	yes	yes	yes	3	no	no		no	no		yes	300	yes	0	no		no	yes	no	yes	3	1	2	1	2	1	1	1	1	2	2	2	2	no	yes	no	yes	yes	no	no	no	no
515	23	10.06.2014	02.09.2014	F	239	3	yes	yes	yes	yes	3	no	no		no	no		yes	300	yes	0	no		no	yes	no	yes	3	1	2	1	2	1	1	1	1	2	2	2	2	no	yes	no	yes	yes	no	no	no	no
516	23	10.06.2014	02.09.2014	F	239	3	yes	yes	yes	yes	3	no	no		no	no		yes	300	yes	0	no		no	yes	no	yes	3	1	2	1	2	1	1	1	1	2	2	2	2	no	yes	no	yes	yes	no	no	no	no
517	24	17.07.2014	25.09.2014	F	228	1	no	yes	yes	no		no	no		no	no			800	no		no		no	yes	yes	yes	2	2	2	2	3	2	2	2	2	2	2	3	3	no	no	no	yes	no	no	no	no	no
518	24	17.07.2014	25.09.2014	F	228	1	no	yes	yes	no		no	no		no	no			800	no		no		no	yes	yes	yes	2	2	2	2	3	2	2	2	2	2	2	3	3	no	no	no	yes	no	no	no	no	no
519	24	17.07.2014	25.09.2014	F	228	1	no	yes	yes	no		no	no		no	no			800	no		no		no	yes	yes	yes	2	2	2	2	3	2	2	2	2	2	2	3	3	no	no	no	yes	no	no	no	no	no
520	24	17.07.2014	25.09.2014	F	228	1	no	yes	yes	no		no	no		no	no			800	no		no		no	yes	yes	yes	2	2	2	2	3	2	2	2	2	2	2	3	3	no	no	no	yes	no	no	no	no	no
521	24	17.07.2014	25.09.2014	F	228	1	no	yes	yes	no		no	no		no	no			800	no		no		no	yes	yes	yes	2	2	2	2	3	2	2	2	2	2	2	3	3	no	no	no	yes	no	no	no	no	no
522	24	17.07.2014	25.09.2014	F	228	1	no	yes	yes	no		no	no		no	no			800	no		no		no	yes	yes	yes	2	2	2	2	3	2	2	2	2	2	2	3	3	no	no	no	yes	no	no	no	no	no
523	24	17.07.2014	25.09.2014	F	228	1	no	yes	yes	no		no	no		no	no			800	no		no		no	yes	yes	yes	2	2	2	2	3	2	2	2	2	2	2	3	3	no	no	no	yes	no	no	no	no	no
524	24	17.07.2014	25.09.2014	F	228	1	no	yes	yes	no		no	no		no	no			800	no		no		no	yes	yes	yes	2	2	2	2	3	2	2	2	2	2	2	3	3	no	no	no	yes	no	no	no	no	no
525	24	17.07.2014	25.09.2014	F	228	1	no	yes	yes	no		no	no		no	no			800	no		no		no	yes	yes	yes	2	2	2	2	3	2	2	2	2	2	2	3	3	no	no	no	yes	no	no	no	no	no
526	24	17.07.2014	25.09.2014	F	228	1	no	yes	yes	no		no	no		no	no			800	no		no		no	yes	yes	yes	2	2	2	2	3	2	2	2	2	2	2	3	3	no	no	no	yes	no	no	no	no	no
527	24	17.07.2014	25.09.2014	F	228	1	no	yes	yes	no		no	no		no	no			800	no		no		no	yes	yes	yes	2	2	2	2	3	2	2	2	2	2	2	3	3	no	no	no	yes	no	no	no	no	no
528	24	17.07.2014	25.09.2014	F	228	1	no	yes	yes	no		no	no		no	no			800	no		no		no	yes	yes	yes	2	2	2	2	3	2	2	2	2	2	2	3	3	no	no	no	yes	no	no	no	no	no
529	24	17.07.2014	25.09.2014	F	228	1	no	yes	yes	no		no	no		no	no			800	no		no		no	yes	yes	yes	2	2	2	2	3	2	2	2	2	2	2	3	3	no	no	no	yes	no	no	no	no	no
530	24	17.07.2014	25.09.2014	F	228	1	no	yes	yes	no		no	no		no	no			800	no		no		no	yes	yes	yes	2	2	2	2	3	2	2	2	2	2	2	3	3	no	no	no	yes	no	no	no	no	no
531	24	17.07.2014	25.09.2014	F	228	1	no	yes	yes	no		no	no		no	no			800	no		no		no	yes	yes	yes	2	2	2	2	3	2	2	2	2	2	2	3	3	no	no	no	yes	no	no	no	no	no
532	24	17.07.2014	25.09.2014	F	228	1	no	yes	yes	no		no	no		no	no			800	no		no		no	yes	yes	yes	2	2	2	2	3	2	2	2	2	2	2	3	3	no	no	no	yes	no	no	no	no	no
533	24	17.07.2014	25.09.2014	F	228	1	no	yes	yes	no		no	no		no	no			800	no		no		no	yes	yes	yes	2	2	2	2	3	2	2	2	2	2	2	3	3	no	no	no	yes	no	no	no	no	no
534	24	17.07.2014	25.09.2014	F	228	1	no	yes	yes	no		no	no		no	no			800	no		no		no	yes	yes	yes	2	2	2	2	3	2	2	2	2	2	2	3	3	no	no	no	yes	no	no	no	no	no
535	24	17.07.2014	25.09.2014	F	228	1	no	yes	yes	no		no	no		no	no			800	no		no		no	yes	yes	yes	2	2	2	2	3	2	2	2	2	2	2	3	3	no	no	no	yes	no	no	no	no	no
536	24	17.07.2014	25.09.2014	F	228	1	no	yes	yes	no		no	no		no	no			800	no		no		no	yes	yes	yes	2	2	2	2	3	2	2	2	2	2	2	3	3	no	no	no	yes	no	no	no	no	no
537	25	19.08.2014	02.12.2014	FF	272	0	no	no	no	yes	10	no	no		no	no		no	500	yes	100	no		no	no	no	yes	2	3	3	2	1	2	3		3	2	2		2	no	no	no	no	no	no	no	no	no
538	25	19.08.2014	02.12.2014	FF	272	0	no	no	no	yes	10	no	no		no	no		no	500	yes	100	no		no	no	no	yes	2	3	3	2	1	2	3		3	2	2		2	no	no	no	no	no	no	no	no	no
539	25	19.08.2014	02.12.2014	FF	272	0	no	no	no	yes	10	no	no		no	no		no	500	yes	100	no		no	no	no	yes	2	3	3	2	1	2	3		3	2	2		2	no	no	no	no	no	no	no	no	no
540	25	19.08.2014	02.12.2014	FF	272	0	no	no	no	yes	10	no	no		no	no		no	500	yes	100	no		no	no	no	yes	2	3	3	2	1	2	3		3	2	2		2	no	no	no	no	no	no	no	no	no
541	25	19.08.2014	02.12.2014	FF	272	0	no	no	no	yes	10	no	no		no	no		no	500	yes	100	no		no	no	no	yes	2	3	3	2	1	2	3		3	2	2		2	no	no	no	no	no	no	no	no	no
542	25	19.08.2014	02.12.2014	FF	272	0	no	no	no	yes	10	no	no		no	no		no	500	yes	100	no		no	no	no	yes	2	3	3	2	1	2	3		3	2	2		2	no	no	no	no	no	no	no	no	no
543	25	19.08.2014	02.12.2014	FF	272	0	no	no	no	yes	10	no	no		no	no		no	500	yes	100	no		no	no	no	yes	2	3	3	2	1	2	3		3	2	2		2	no	no	no	no	no	no	no	no	no
544	25	19.08.2014	02.12.2014	FF	272	0	no	no	no	yes	10	no	no		no	no		no	500	yes	100	no		no	no	no	yes	2	3	3	2	1	2	3		3	2	2		2	no	no	no	no	no	no	no	no	no
545	25	19.08.2014	02.12.2014	FF	272	0	no	no	no	yes	10	no	no		no	no		no	500	yes	100	no		no	no	no	yes	2	3	3	2	1	2	3		3	2	2		2	no	no	no	no	no	no	no	no	no
546	25	19.08.2014	02.12.2014	FF	272	0	no	no	no	yes	10	no	no		no	no		no	500	yes	100	no		no	no	no	yes	2	3	3	2	1	2	3		3	2	2		2	no	no	no	no	no	no	no	no	no
547	25	19.08.2014	02.12.2014	FF	272	0	no	no	no	yes	10	no	no		no	no		no	500	yes	100	no		no	no	no	yes	2	3	3	2	1	2	3		3	2	2		2	no	no	no	no	no	no	no	no	no
548	25	19.08.2014	02.12.2014	FF	272	0	no	no	no	yes	10	no	no		no	no		no	500	yes	100	no		no	no	no	yes	2	3	3	2	1	2	3		3	2	2		2	no	no	no	no	no	no	no	no	no
549	25	19.08.2014	02.12.2014	FF	272	0	no	no	no	yes	10	no	no		no	no		no	500	yes	100	no		no	no	no	yes	2	3	3	2	1	2	3		3	2	2		2	no	no	no	no	no	no	no	no	no
550	25	19.08.2014	02.12.2014	FF	272	0	no	no	no	yes	10	no	no		no	no		no	500	yes	100	no		no	no	no	yes	2	3	3	2	1	2	3		3	2	2		2	no	no	no	no	no	no	no	no	no
551	25	19.08.2014	02.12.2014	FF	272	0	no	no	no	yes	10	no	no		no	no		no	500	yes	100	no		no	no	no	yes	2	3	3	2	1	2	3		3	2	2		2	no	no	no	no	no	no	no	no	no
552	25	19.08.2014	02.12.2014	FF	272	0	no	no	no	yes	10	no	no		no	no		no	500	yes	100	no		no	no	no	yes	2	3	3	2	1	2	3		3	2	2		2	no	no	no	no	no	no	no	no	no
553	25	19.08.2014	02.12.2014	FF	272	0	no	no	no	yes	10	no	no		no	no		no	500	yes	100	no		no	no	no	yes	2	3	3	2	1	2	3		3	2	2		2	no	no	no	no	no	no	no	no	no
554	25	19.08.2014	02.12.2014	FF	272	0	no	no	no	yes	10	no	no		no	no		no	500	yes	100	no		no	no	no	yes	2	3	3	2	1	2	3		3	2	2		2	no	no	no	no	no	no	no	no	no
555	25	19.08.2014	02.12.2014	FF	272	0	no	no	no	yes	10	no	no		no	no		no	500	yes	100	no		no	no	no	yes	2	3	3	2	1	2	3		3	2	2		2	no	no	no	no	no	no	no	no	no
556	25	19.08.2014	02.12.2014	FF	272	0	no	no	no	yes	10	no	no		no	no		no	500	yes	100	no		no	no	no	yes	2	3	3	2	1	2	3		3	2	2		2	no	no	no	no	no	no	no	no	no
557	26	26.08.2014	27.11.2014	F	475	1	no	yes	yes	yes	2000	no	yes	0	yes	no		yes	1000	no		no		no	no	yes	yes	2	1	1	1	1	2	1	1	2	3	1	2	2	yes	yes	no	yes	yes	no	no	no	no
558	26	26.08.2014	27.11.2014	F	475	1	no	yes	yes	yes	2000	no	yes	0	yes	no		yes	1000	no		no		no	no	yes	yes	2	1	1	1	1	2	1	1	2	3	1	2	2	yes	yes	no	yes	yes	no	no	no	no
559	26	26.08.2014	27.11.2014	F	475	1	no	yes	yes	yes	2000	no	yes	0	yes	no		yes	1000	no		no		no	no	yes	yes	2	1	1	1	1	2	1	1	2	3	1	2	2	yes	yes	no	yes	yes	no	no	no	no
560	26	26.08.2014	27.11.2014	F	475	1	no	yes	yes	yes	2000	no	yes	0	yes	no		yes	1000	no		no		no	no	yes	yes	2	1	1	1	1	2	1	1	2	3	1	2	2	yes	yes	no	yes	yes	no	no	no	no
561	26	26.08.2014	27.11.2014	F	475	1	no	yes	yes	yes	2000	no	yes	0	yes	no		yes	1000	no		no		no	no	yes	yes	2	1	1	1	1	2	1	1	2	3	1	2	2	yes	yes	no	yes	yes	no	no	no	no
562	26	26.08.2014	27.11.2014	F	475	1	no	yes	yes	yes	2000	no	yes	0	yes	no		yes	1000	no		no		no	no	yes	yes	2	1	1	1	1	2	1	1	2	3	1	2	2	yes	yes	no	yes	yes	no	no	no	no
563	26	26.08.2014	27.11.2014	F	475	1	no	yes	yes	yes	2000	no	yes	0	yes	no		yes	1000	no		no		no	no	yes	yes	2	1	1	1	1	2	1	1	2	3	1	2	2	yes	yes	no	yes	yes	no	no	no	no
564	26	26.08.2014	27.11.2014	F	475	1	no	yes	yes	yes	2000	no	yes	0	yes	no		yes	1000	no		no		no	no	yes	yes	2	1	1	1	1	2	1	1	2	3	1	2	2	yes	yes	no	yes	yes	no	no	no	no
565	26	26.08.2014	27.11.2014	F	475	1	no	yes	yes	yes	2000	no	yes	0	yes	no		yes	1000	no		no		no	no	yes	yes	2	1	1	1	1	2	1	1	2	3	1	2	2	yes	yes	no	yes	yes	no	no	no	no
566	26	26.08.2014	27.11.2014	F	475	1	no	yes	yes	yes	2000	no	yes	0	yes	no		yes	1000	no		no		no	no	yes	yes	2	1	1	1	1	2	1	1	2	3	1	2	2	yes	yes	no	yes	yes	no	no	no	no
567	26	26.08.2014	27.11.2014	F	475	1	no	yes	yes	yes	2000	no	yes	0	yes	no		yes	1000	no		no		no	no	yes	yes	2	1	1	1	1	2	1	1	2	3	1	2	2	yes	yes	no	yes	yes	no	no	no	no
568	26	26.08.2014	27.11.2014	F	475	1	no	yes	yes	yes	2000	no	yes	0	yes	no		yes	1000	no		no		no	no	yes	yes	2	1	1	1	1	2	1	1	2	3	1	2	2	yes	yes	no	yes	yes	no	no	no	no
569	26	26.08.2014	27.11.2014	F	475	1	no	yes	yes	yes	2000	no	yes	0	yes	no		yes	1000	no		no		no	no	yes	yes	2	1	1	1	1	2	1	1	2	3	1	2	2	yes	yes	no	yes	yes	no	no	no	no
570	26	26.08.2014	27.11.2014	F	475	1	no	yes	yes	yes	2000	no	yes	0	yes	no		yes	1000	no		no		no	no	yes	yes	2	1	1	1	1	2	1	1	2	3	1	2	2	yes	yes	no	yes	yes	no	no	no	no
571	26	26.08.2014	27.11.2014	F	475	1	no	yes	yes	yes	2000	no	yes	0	yes	no		yes	1000	no		no		no	no	yes	yes	2	1	1	1	1	2	1	1	2	3	1	2	2	yes	yes	no	yes	yes	no	no	no	no
572	26	26.08.2014	27.11.2014	F	475	1	no	yes	yes	yes	2000	no	yes	0	yes	no		yes	1000	no		no		no	no	yes	yes	2	1	1	1	1	2	1	1	2	3	1	2	2	yes	yes	no	yes	yes	no	no	no	no
573	26	26.08.2014	27.11.2014	F	475	1	no	yes	yes	yes	2000	no	yes	0	yes	no		yes	1000	no		no		no	no	yes	yes	2	1	1	1	1	2	1	1	2	3	1	2	2	yes	yes	no	yes	yes	no	no	no	no
574	26	26.08.2014	27.11.2014	F	475	1	no	yes	yes	yes	2000	no	yes	0	yes	no		yes	1000	no		no		no	no	yes	yes	2	1	1	1	1	2	1	1	2	3	1	2	2	yes	yes	no	yes	yes	no	no	no	no
575	26	26.08.2014	27.11.2014	F	475	1	no	yes	yes	yes	2000	no	yes	0	yes	no		yes	1000	no		no		no	no	yes	yes	2	1	1	1	1	2	1	1	2	3	1	2	2	yes	yes	no	yes	yes	no	no	no	no
576	26	26.08.2014	27.11.2014	F	475	1	no	yes	yes	yes	2000	no	yes	0	yes	no		yes	1000	no		no		no	no	yes	yes	2	1	1	1	1	2	1	1	2	3	1	2	2	yes	yes	no	yes	yes	no	no	no	no
577	27	06.10.2014	15.12.2014	F	1000	3	no	no	yes	no		no	no		no	no			600	no		no		no	no	no	no	1	2	1	1	1	1	1		1	1	2		2	no	no	no	no	yes	yes	yes	yes	no
578	27	06.10.2014	15.12.2014	F	1000	3	no	no	yes	no		no	no		no	no			600	no		no		no	no	no	no	1	2	1	1	1	1	1		1	1	2		2	no	no	no	no	yes	yes	yes	yes	no
579	27	06.10.2014	15.12.2014	F	1000	3	no	no	yes	no		no	no		no	no			600	no		no		no	no	no	no	1	2	1	1	1	1	1		1	1	2		2	no	no	no	no	yes	yes	yes	yes	no
580	27	06.10.2014	15.12.2014	F	1000	3	no	no	yes	no		no	no		no	no			600	no		no		no	no	no	no	1	2	1	1	1	1	1		1	1	2		2	no	no	no	no	yes	yes	yes	yes	no
581	27	06.10.2014	15.12.2014	F	1000	3	no	no	yes	no		no	no		no	no			600	no		no		no	no	no	no	1	2	1	1	1	1	1		1	1	2		2	no	no	no	no	yes	yes	yes	yes	no
582	27	06.10.2014	15.12.2014	F	1000	3	no	no	yes	no		no	no		no	no			600	no		no		no	no	no	no	1	2	1	1	1	1	1		1	1	2		2	no	no	no	no	yes	yes	yes	yes	no
583	27	06.10.2014	15.12.2014	F	1000	3	no	no	yes	no		no	no		no	no			600	no		no		no	no	no	no	1	2	1	1	1	1	1		1	1	2		2	no	no	no	no	yes	yes	yes	yes	no
584	27	06.10.2014	15.12.2014	F	1000	3	no	no	yes	no		no	no		no	no			600	no		no		no	no	no	no	1	2	1	1	1	1	1		1	1	2		2	no	no	no	no	yes	yes	yes	yes	no
585	27	06.10.2014	15.12.2014	F	1000	3	no	no	yes	no		no	no		no	no			600	no		no		no	no	no	no	1	2	1	1	1	1	1		1	1	2		2	no	no	no	no	yes	yes	yes	yes	no
586	27	06.10.2014	15.12.2014	F	1000	3	no	no	yes	no		no	no		no	no			600	no		no		no	no	no	no	1	2	1	1	1	1	1		1	1	2		2	no	no	no	no	yes	yes	yes	yes	no
587	27	06.10.2014	15.12.2014	F	1000	3	no	no	yes	no		no	no		no	no			600	no		no		no	no	no	no	1	2	1	1	1	1	1		1	1	2		2	no	no	no	no	yes	yes	yes	yes	no
588	27	06.10.2014	15.12.2014	F	1000	3	no	no	yes	no		no	no		no	no			600	no		no		no	no	no	no	1	2	1	1	1	1	1		1	1	2		2	no	no	no	no	yes	yes	yes	yes	no
589	27	06.10.2014	15.12.2014	F	1000	3	no	no	yes	no		no	no		no	no			600	no		no		no	no	no	no	1	2	1	1	1	1	1		1	1	2		2	no	no	no	no	yes	yes	yes	yes	no
590	27	06.10.2014	15.12.2014	F	1000	3	no	no	yes	no		no	no		no	no			600	no		no		no	no	no	no	1	2	1	1	1	1	1		1	1	2		2	no	no	no	no	yes	yes	yes	yes	no
591	27	06.10.2014	15.12.2014	F	1000	3	no	no	yes	no		no	no		no	no			600	no		no		no	no	no	no	1	2	1	1	1	1	1		1	1	2		2	no	no	no	no	yes	yes	yes	yes	no
592	27	06.10.2014	15.12.2014	F	1000	3	no	no	yes	no		no	no		no	no			600	no		no		no	no	no	no	1	2	1	1	1	1	1		1	1	2		2	no	no	no	no	yes	yes	yes	yes	no
593	27	06.10.2014	15.12.2014	F	1000	3	no	no	yes	no		no	no		no	no			600	no		no		no	no	no	no	1	2	1	1	1	1	1		1	1	2		2	no	no	no	no	yes	yes	yes	yes	no
594	27	06.10.2014	15.12.2014	F	1000	3	no	no	yes	no		no	no		no	no			600	no		no		no	no	no	no	1	2	1	1	1	1	1		1	1	2		2	no	no	no	no	yes	yes	yes	yes	no
595	27	06.10.2014	15.12.2014	F	1000	3	no	no	yes	no		no	no		no	no			600	no		no		no	no	no	no	1	2	1	1	1	1	1		1	1	2		2	no	no	no	no	yes	yes	yes	yes	no
596	27	06.10.2014	15.12.2014	F	1000	3	no	no	yes	no		no	no		no	no			600	no		no		no	no	no	no	1	2	1	1	1	1	1		1	1	2		2	no	no	no	no	yes	yes	yes	yes	no
597	28	10.10.2014	19.12.2014	FF	176	0	no	yes	yes	yes	20	no	no		no	no		yes	100	no		no		no	yes	yes	yes	2	1	1	1	1	2	2	2	2	2	2	1	2	no	yes	no	no	no	no	no	no	no
598	28	10.10.2014	19.12.2014	FF	176	0	no	yes	yes	yes	20	no	no		no	no		yes	100	no		no		no	yes	yes	yes	2	1	1	1	1	2	2	2	2	2	2	1	2	no	yes	no	no	no	no	no	no	no
599	28	10.10.2014	19.12.2014	FF	176	0	no	yes	yes	yes	20	no	no		no	no		yes	100	no		no		no	yes	yes	yes	2	1	1	1	1	2	2	2	2	2	2	1	2	no	yes	no	no	no	no	no	no	no
600	28	10.10.2014	19.12.2014	FF	176	0	no	yes	yes	yes	20	no	no		no	no		yes	100	no		no		no	yes	yes	yes	2	1	1	1	1	2	2	2	2	2	2	1	2	no	yes	no	no	no	no	no	no	no
601	28	10.10.2014	19.12.2014	FF	176	0	no	yes	yes	yes	20	no	no		no	no		yes	100	no		no		no	yes	yes	yes	2	1	1	1	1	2	2	2	2	2	2	1	2	no	yes	no	no	no	no	no	no	no
602	28	10.10.2014	19.12.2014	FF	176	0	no	yes	yes	yes	20	no	no		no	no		yes	100	no		no		no	yes	yes	yes	2	1	1	1	1	2	2	2	2	2	2	1	2	no	yes	no	no	no	no	no	no	no
603	28	10.10.2014	19.12.2014	FF	176	0	no	yes	yes	yes	20	no	no		no	no		yes	100	no		no		no	yes	yes	yes	2	1	1	1	1	2	2	2	2	2	2	1	2	no	yes	no	no	no	no	no	no	no
604	28	10.10.2014	19.12.2014	FF	176	0	no	yes	yes	yes	20	no	no		no	no		yes	100	no		no		no	yes	yes	yes	2	1	1	1	1	2	2	2	2	2	2	1	2	no	yes	no	no	no	no	no	no	no
605	28	10.10.2014	19.12.2014	FF	176	0	no	yes	yes	yes	20	no	no		no	no		yes	100	no		no		no	yes	yes	yes	2	1	1	1	1	2	2	2	2	2	2	1	2	no	yes	no	no	no	no	no	no	no
606	28	10.10.2014	19.12.2014	FF	176	0	no	yes	yes	yes	20	no	no		no	no		yes	100	no		no		no	yes	yes	yes	2	1	1	1	1	2	2	2	2	2	2	1	2	no	yes	no	no	no	no	no	no	no
607	28	10.10.2014	19.12.2014	FF	176	0	no	yes	yes	yes	20	no	no		no	no		yes	100	no		no		no	yes	yes	yes	2	1	1	1	1	2	2	2	2	2	2	1	2	no	yes	no	no	no	no	no	no	no
608	28	10.10.2014	19.12.2014	FF	176	0	no	yes	yes	yes	20	no	no		no	no		yes	100	no		no		no	yes	yes	yes	2	1	1	1	1	2	2	2	2	2	2	1	2	no	yes	no	no	no	no	no	no	no
609	28	10.10.2014	19.12.2014	FF	176	0	no	yes	yes	yes	20	no	no		no	no		yes	100	no		no		no	yes	yes	yes	2	1	1	1	1	2	2	2	2	2	2	1	2	no	yes	no	no	no	no	no	no	no
610	28	10.10.2014	19.12.2014	FF	176	0	no	yes	yes	yes	20	no	no		no	no		yes	100	no		no		no	yes	yes	yes	2	1	1	1	1	2	2	2	2	2	2	1	2	no	yes	no	no	no	no	no	no	no
611	28	10.10.2014	19.12.2014	FF	176	0	no	yes	yes	yes	20	no	no		no	no		yes	100	no		no		no	yes	yes	yes	2	1	1	1	1	2	2	2	2	2	2	1	2	no	yes	no	no	no	no	no	no	no
612	28	10.10.2014	19.12.2014	FF	176	0	no	yes	yes	yes	20	no	no		no	no		yes	100	no		no		no	yes	yes	yes	2	1	1	1	1	2	2	2	2	2	2	1	2	no	yes	no	no	no	no	no	no	no
613	28	10.10.2014	19.12.2014	FF	176	0	no	yes	yes	yes	20	no	no		no	no		yes	100	no		no		no	yes	yes	yes	2	1	1	1	1	2	2	2	2	2	2	1	2	no	yes	no	no	no	no	no	no	no
614	28	10.10.2014	19.12.2014	FF	176	0	no	yes	yes	yes	20	no	no		no	no		yes	100	no		no		no	yes	yes	yes	2	1	1	1	1	2	2	2	2	2	2	1	2	no	yes	no	no	no	no	no	no	no
615	28	10.10.2014	19.12.2014	FF	176	0	no	yes	yes	yes	20	no	no		no	no		yes	100	no		no		no	yes	yes	yes	2	1	1	1	1	2	2	2	2	2	2	1	2	no	yes	no	no	no	no	no	no	no
616	28	10.10.2014	19.12.2014	FF	176	0	no	yes	yes	yes	20	no	no		no	no		yes	100	no		no		no	yes	yes	yes	2	1	1	1	1	2	2	2	2	2	2	1	2	no	yes	no	no	no	no	no	no	no
617	29	15.10.2014	17.12.2014	F	900	2	no	yes	no	no		no	no		no	no		no	10	no		no		no	yes	yes	yes	2	1	1	1	2	2	2	2	2	2	2	2	2	no	no	no	no	yes	yes	yes	yes	no
618	29	15.10.2014	17.12.2014	F	900	2	no	yes	no	no		no	no		no	no		no	10	no		no		no	yes	yes	yes	2	1	1	1	2	2	2	2	2	2	2	2	2	no	no	no	no	yes	yes	yes	yes	no
619	29	15.10.2014	17.12.2014	F	900	2	no	yes	no	no		no	no		no	no		no	10	no		no		no	yes	yes	yes	2	1	1	1	2	2	2	2	2	2	2	2	2	no	no	no	no	yes	yes	yes	yes	no
620	29	15.10.2014	17.12.2014	F	900	2	no	yes	no	no		no	no		no	no		no	10	no		no		no	yes	yes	yes	2	1	1	1	2	2	2	2	2	2	2	2	2	no	no	no	no	yes	yes	yes	yes	no
621	29	15.10.2014	17.12.2014	F	900	2	no	yes	no	no		no	no		no	no		no	10	no		no		no	yes	yes	yes	2	1	1	1	2	2	2	2	2	2	2	2	2	no	no	no	no	yes	yes	yes	yes	no
622	29	15.10.2014	17.12.2014	F	900	2	no	yes	no	no		no	no		no	no		no	10	no		no		no	yes	yes	yes	2	1	1	1	2	2	2	2	2	2	2	2	2	no	no	no	no	yes	yes	yes	yes	no
623	29	15.10.2014	17.12.2014	F	900	2	no	yes	no	no		no	no		no	no		no	10	no		no		no	yes	yes	yes	2	1	1	1	2	2	2	2	2	2	2	2	2	no	no	no	no	yes	yes	yes	yes	no
624	29	15.10.2014	17.12.2014	F	900	2	no	yes	no	no		no	no		no	no		no	10	no		no		no	yes	yes	yes	2	1	1	1	2	2	2	2	2	2	2	2	2	no	no	no	no	yes	yes	yes	yes	no
625	29	15.10.2014	17.12.2014	F	900	2	no	yes	no	no		no	no		no	no		no	10	no		no		no	yes	yes	yes	2	1	1	1	2	2	2	2	2	2	2	2	2	no	no	no	no	yes	yes	yes	yes	no
626	29	15.10.2014	17.12.2014	F	900	2	no	yes	no	no		no	no		no	no		no	10	no		no		no	yes	yes	yes	2	1	1	1	2	2	2	2	2	2	2	2	2	no	no	no	no	yes	yes	yes	yes	no
627	29	15.10.2014	17.12.2014	F	900	2	no	yes	no	no		no	no		no	no		no	10	no		no		no	yes	yes	yes	2	1	1	1	2	2	2	2	2	2	2	2	2	no	no	no	no	yes	yes	yes	yes	no
628	29	15.10.2014	17.12.2014	F	900	2	no	yes	no	no		no	no		no	no		no	10	no		no		no	yes	yes	yes	2	1	1	1	2	2	2	2	2	2	2	2	2	no	no	no	no	yes	yes	yes	yes	no
629	29	15.10.2014	17.12.2014	F	900	2	no	yes	no	no		no	no		no	no		no	10	no		no		no	yes	yes	yes	2	1	1	1	2	2	2	2	2	2	2	2	2	no	no	no	no	yes	yes	yes	yes	no
630	29	15.10.2014	17.12.2014	F	900	2	no	yes	no	no		no	no		no	no		no	10	no		no		no	yes	yes	yes	2	1	1	1	2	2	2	2	2	2	2	2	2	no	no	no	no	yes	yes	yes	yes	no
631	29	15.10.2014	17.12.2014	F	900	2	no	yes	no	no		no	no		no	no		no	10	no		no		no	yes	yes	yes	2	1	1	1	2	2	2	2	2	2	2	2	2	no	no	no	no	yes	yes	yes	yes	no
632	29	15.10.2014	17.12.2014	F	900	2	no	yes	no	no		no	no		no	no		no	10	no		no		no	yes	yes	yes	2	1	1	1	2	2	2	2	2	2	2	2	2	no	no	no	no	yes	yes	yes	yes	no
633	29	15.10.2014	17.12.2014	F	900	2	no	yes	no	no		no	no		no	no		no	10	no		no		no	yes	yes	yes	2	1	1	1	2	2	2	2	2	2	2	2	2	no	no	no	no	yes	yes	yes	yes	no
634	29	15.10.2014	17.12.2014	F	900	2	no	yes	no	no		no	no		no	no		no	10	no		no		no	yes	yes	yes	2	1	1	1	2	2	2	2	2	2	2	2	2	no	no	no	no	yes	yes	yes	yes	no
635	29	15.10.2014	17.12.2014	F	900	2	no	yes	no	no		no	no		no	no		no	10	no		no		no	yes	yes	yes	2	1	1	1	2	2	2	2	2	2	2	2	2	no	no	no	no	yes	yes	yes	yes	no
636	29	15.10.2014	17.12.2014	F	900	2	no	yes	no	no		no	no		no	no		no	10	no		no		no	yes	yes	yes	2	1	1	1	2	2	2	2	2	2	2	2	2	no	no	no	no	yes	yes	yes	yes	no
Legend
* scores used in this table:
1 = lowest score (cleanest or lowest rate)
2 = medium score
3 = highest score (least hygienic or highest rate)
1st = first sampling
2nd = second sampling
[truncated: 36 more columns]
